## Research Article

# Biological enrichment prediction of polychlorinated biphenyls and novel molecular design based on 3D-QSAR/HQSAR associated with molecule docking

Jiawen Yang<sup>1,2</sup>, Wenwen Gu<sup>1,2</sup> and Yu Li<sup>1,2</sup>

<sup>1</sup>College of Environmental Science and Engineering, North China Electric Power University, Beijing, China; <sup>2</sup>Moe Key Laboratory of Resources and Environmental Systems Optimization, North China Electric Power University, Beijing, China

Correspondence: Yu Li (liyuxx8@hotmail.com)

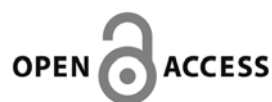

Based on the experimental data of octanol-water partition coefficients ( $K_{ow}$ , represents bioaccumulation) for 13 polychlorinated biphenyl (PCB) congeners, comparative molecular field analysis (CoMFA) and comparative molecular similarity indices analysis (CoMSIA) were used to establish 3D-QSAR models, combined with the hologram quantitative structure–activity relationship (HQSAR), the substitution sites (mono-substituted and bis-substituted) and substituent groups (electron-withdrawing hydrophobic groups) that significantly affect the octanol-water partition coefficients values of PCBs were identified, a total of 63 monosubstituted and bis-substituted were identified. Compared with using 3D-QSAR model alone, the coupling of 3D-QSAR and HQSAR models greatly increased the number of newly designed bis-substituted molecules, and the  $\log K_{ow}$  reduction in newly designed bis-substituted molecules was larger than that of monosubstituted molecules. This was established to predict the  $K_{ow}$  values of 196 additional PCBs and carry out a modification of target molecular PCB-207 to lower its  $K_{ow}$  (biological enrichment) significantly, simultaneously maintaining the flame retardancy and insulativity after calculation by using Gaussian09. Simultaneously, molecular docking could further screen out three more environmental friendly low biological enrichment newly designed PCB-207 molecules (5-methyl-PCB-207, 5-amino-PCB-207, and 4-amino-5-ethyl-PCB-207).

## Introduction

Polychlorinated biphenyls (PCBs for short) are the general names of compounds based on the substitution of a hydrogen atom on a benzene ring with a chlorine atom, including 209 congeners characterized by the number and position of the chlorine atoms on the biphenyl core. PCBs are one of the persistent organic pollutants (POPs); PCBs are high in stability, toxicity, environmental persistence, bioaccumulation, long-distance migration ability, and other characteristics. PCBs have the advantages of low solubility, high dielectric constant, low vapor pressure, good heat resistance, and excellent insulating properties. PCBs widely served as flame retardant, paint, dielectric fluids in capacitors, insulating oil in transformers, and as a plasticizer agent and rubber sealants [1].

In the 1970s, PCBs were prohibited from being produced and used worldwide [2]. However, because of the high stability of PCBs and PCBs themselves being resistant to their natural degradation process, the discontinuation does not mean that the hidden dangers are eliminated, and the destructiveness of PCBs can persist for several years. Today, 40 years after the PCBs have been banned globally, PCB residues are still universally detected in organisms and various environmental media in the world, affecting various organisms including humans through the cumulative effect of the food chain. The hazards to environment posed by PCBs are longer term and more complex and have become global environmental

Received: 19 March 2018  
Revised: 11 April 2018  
Accepted: 12 April 2018

Version of Record published:  
17 May 2019

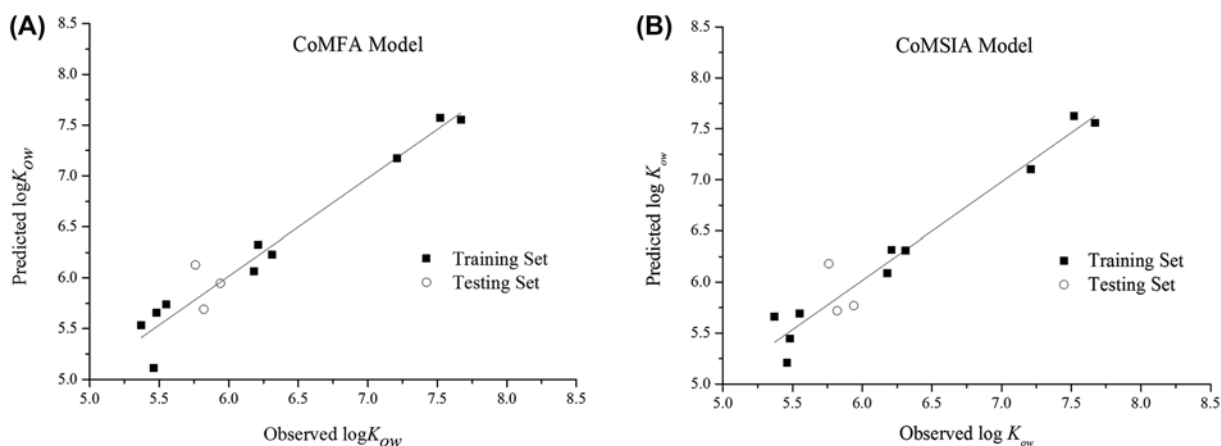

**Figure 1.** Plot of observed compared with predicted  $\log K_{ow}$  values using the CoMFA model (A) and CoMSIA model (B). Plot of observed compared with predicted  $\log K_{ow}$  values using the CoMFA model (A) and CoMSIA model (B).

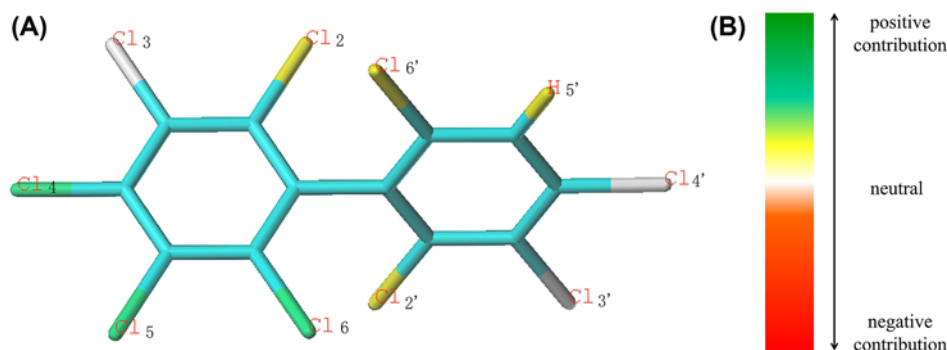

**Figure 2.** Activity contribution diagram of PCB-207 (A), contribution maps of optimal HQSAR model (B). Activity contribution diagram of PCB-207 (A), contribution maps of optimal HQSAR model (B).

issues that pose a serious threat to human health and the ecological environment. Therefore, studies on PCBs are of great significance in the environmental pollution and biological health aspects and have received substantially more global attention.

3D-QSAR, which could reveal the structure–activity relationship of compounds by analyzing the changes of 3D spatial fields around the superposed molecules, overcomes the limitations of the conventional 2D model in characterizing the relationship between property and substance and have a clearer physical meaning and more abundant information of the molecular field energy, thus 3D-QSAR is more widely used in environmental science and toxicology and other fields than 2D-QSAR [3]. Some studies have also used some kind of bacteria to establish the method of toxicity test of some chemicals, and obtained good research results [4,5]. Su et al. [6] determined the combined toxicity of phenolic compounds and heavy metal lead to the photobacterium and then conducted a QSAR study. In addition to the use of 3D-QSAR method, this dissertation also combined hologram quantitative structure–activity relat

ionship (HQSAR) method together to explore the mechanisms that affect the activity of PCB compounds.

In recent years, various methods have been used to estimate the biological enrichment coefficients of PCBs in various mediums, and to assess the biological enrichment degree of PCBs in sediments and various biological mediums. The concentration of PCBs detected in main species in the food chain of the Antarctic and Arctic has reached moderate levels of contamination [7]. Engel et al. [8] used logistic regression analysis to find that some PCBs in serum were associated with an increased risk of lymphoma. Experts in environmental field at home and abroad have also conducted a great deal of research on the migration and conversion behavior, ecological effects, toxicity as well as pollution elimination methods of PCBs in water bodies, sediments, soils, and organisms [9–14], including microbial

degradation and bioremediation methods of PCBs [15]. At present, the researches on PCBs in terms of toxicology, exposure characteristics, adsorption, and degradation have been relatively comprehensive, but there is a lack of research on the modification of the POPs characteristics at the molecular structure level.

Although PCBs have been banned, but there are still residues on the global scale, and the modification of PCBs in the present paper was based on the residual PCBs. PCBs have the advantages of various commercial functional properties, and modification of PCB molecules makes sense if the POP properties of newly designed PCB molecules are reduced or even removed from POPs without changing their functional properties.

In the present paper, HQSAR and 3D-QSAR models were established by using with 13 PCB octanol-water partition coefficients ( $K_{ow}$ ) from Hawker and Connell [16]. The substitution sites and substituent groups that affect the octanol-water partition coefficients of PCBs were determined by combining these two models. And carry out a modification of target molecular PCB-207 to lower its  $K_{ow}$  (biological enrichment). Only using the 3D contour plot of 3D-QSAR to determine the substitution sites and substituent groups, the fewer sites and groups can be obtained, and almost impossible to do the double-site substitution. Less scheme on molecular modification, it is not enough to provide reference for future research. The octanol-water partition coefficient ( $K_{ow}$ ), which can reflect the distribution ability of organic compounds between octanol and aqueous phases, is one of the effective index of the distribution of organic compound in environmental media (water, soil, and sediment) and is also one of the important property parameters used to study the environmental behavior of organic compounds. Additionally,  $K_{ow}$  can simulate the distribution of organic between biological phase and water phase, and it is closely related to the toxicity [17], biological enrichment [18], and solubility [19] of compounds.

Through the evaluation of toxicity, persistence, and long-range mobility, the low biological enrichment newly designed PCB-207 molecules, all the POP characteristic parameters are reduced while the actual functional properties are not changed, fulfilling their industrial and commercial functional requirements and greatly reducing the environmental impact. Furthermore, the correlation analysis between the number of Cl atoms in PCBs and the average value of  $\log K_{ow}$  of isomer in chlorobiphenyl to decachlorobiphenyl, respectively, showed that with the increase in the number of Cl atoms, the  $\log K_{ow}$  values also increase and the biological enrichment capability becomes stronger, and the results of molecular docking between PCBs and degrading enzyme BphA also confirmed this conclusion.

The target pollutant PCB-207 selected in the present paper has large observed  $\log K_{ow}$  value of 7.52. After modification, the  $\log K_{ow}$  values of newly designed molecules decreased and the lowest reached 5.489. When  $\log K_{ow} < 5$ , the compounds were judged to be divorced from POPs, if the modification is carried out by using PCBs with less chlorine atoms as target molecular, which the  $\log K_{ow}$  values of the compounds are relatively small, the  $\log K_{ow}$  values can also be reduced by the same extent, then that of modified compounds must be less than 5, which can make the newly designed compounds out of the scope of POPs. In the present paper, we mainly come up with a modified method for the residual PCBs range from chlorobiphenyl to decachlorobiphenyl, which provides a theoretical basis in methods for the conversion of residual PCBs into low environmental impact compounds. In addition, the molecular docking technique was used to further study the biological enrichment of the modified molecules on the liver tissue where the liver enzymes exist in, and it was found that not all of bioaccumulation of newly designed molecules of low biological enrichment of PCB-207 was reduced on liver tissue. But it can be screened out that the several kinds of low biological enrichment newly designed PCB-207 molecules from all newly designed PCB-207 molecules have lower biological enrichment in liver tissue where most liver enzymes exist in, and provide an important theoretical method for the study of bioaccumulation of PCBs in the future. The present paper is expected to provide a theoretical foundation for further study of biological enrichment of PCBs.

## Materials and methods

### The establishment of PCBs bioconcentration 3D-QSAR/HOSAR models

The comparative molecular field analysis (CoMFA), comparative molecular similarity indices analysis (CoMSIA) models, HQSAR model that was used for  $K_{ow}$  value prediction and low biological enrichment molecular design were established with Sybyl-X 2.0 software to analyze the 3D/HQSAR models and perform the molecular docking.

The lowest energy conformation of the molecule was used as the advantage stable conformation; the geometry of these compounds was subsequently optimized using Tripos force field with the Gasteiger-Huckel charges. Repeated minimizations were performed by the Powell method with a maximum iteration of 10000 to reach an energy convergence gradient value of 0.005 kJ/mol, and others are default values.

To establish the 3D-QSAR models, the whole dataset (containing 13 compounds) was divided 3:1 into a training set (containing ten compounds) for 3D-QSAR model generation and a test set (containing three compounds) for model validation for its accuracy and stability. Compounds in the training set were selected based on their ability to

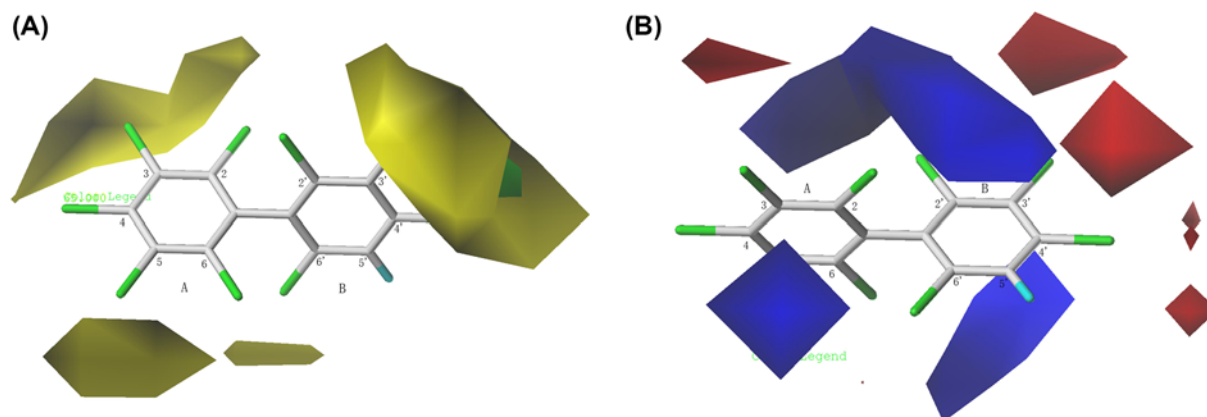

**Figure 3. Contour maps of the CoMFA model: (A) steric fields and (B) electrostatic fields.**

Contour maps of the CoMFA model: (A) steric fields and (B) electrostatic fields.

appropriately represent the structural diversity of the whole dataset and cover the range of  $\log K_{ow}$  values [20,21]. In this paper, we have chosen a set of training set and test set that both internal and external verifications were qualified to establish 3D-QSAR model. In this process, the 2,2',3,3',4,4',5,5'-octachlorobiphenyl (PCB-194) molecule with the largest  $\log K_{ow}$  was used as the template and the benzene ring skeleton was used as a model skeleton to align the other compounds using the Align Database command in Sybyl. The 3D-QSAR of CoMFA and CoMSIA was directly yielded by partial least squares (PLS) analyses in which the ten  $\log K_{ow}$  values of PCBs in training set served as the dependent variable, and the 3D structure of ten PCBs served as the independent variable. In this process, the leave-one-out (LOO) cross-validation procedure was performed to determine the optimum number of components ( $n$ ) and the highest cross-validation correlation coefficient ( $q^2$ ) for the correlation models. Simultaneously, noncross-validated analysis was performed. The quality of the models was measured by cross-validation correlation coefficient ( $q^2$ ), noncross-validation correlation coefficient ( $r^2$ ), standard error of estimate (SEE), and Fisher test (F) values. Finally, the relationship between the  $\log K_{ow}$  of the PCB compounds and each field was expressed as a 3D contour plot.

HQSAR model does not require the selection of active conformations and the alignment of PCB molecules, HQSAR and PLS analysis was conducted using the Sybyl-X 2.0 package by Tripos Company. HQSAR calculations were carried out using three distinct parameters the fragment distinction, the fragment size, and the hologram length. Use SYBYL-HQSAR module to generate molecular hologram. The HQSAR calculation provides 12 default prime number (53, 59, 61, 71, 83, 97, 151, 199, 257, 307, 353, and 401) molecular hologram lengths by default. The HQSAR model can be optimized by changing the fragment distinction and the molecular fragment size. The fragment discrimination represents the topology parameter mapped in the molecular holography, which included atoms (A), bonds (B), connections (C), hydrogen atoms (H), chirality (Ch), and donor and acceptor (DA), in which atoms (A) can distinguish the different types of atoms; the bonds (B) can identify the difference amongst the chemical bonds formed by the atoms; connections (C) can reveal the hybridization state of atoms inside the fragment; Ch can obtain stereochemical information of atomic Ch and chemical bonds in fragments; hydrogen bond DA can ascertain hydrogen bond donor or acceptor of fragments. In general, the default setting A/B/C for the fragment distinction has already contained the basic information required to distinguish different fragments. On this basis, adding other fragment distinction parameters, establishing different combinations of fragment distinction parameters, selecting different fragment sizes. And the HQSAR models were obtained in specific preset parameters. The fragment size is the number of atoms contained in the fragment: (1–3) means the smaller atomic fragments, which can characterize the atomic type and functional groups, approximately (4–7) means medium atomic fragments that could distinguish the chain length of the alicyclic hydrocarbon or the characters and the structural features such as the substitution sites and substituent groups of the aromatic hydrocarbon; (8–10) means larger atomic fragments.

HQSAR models (method) were conducted according to the different parameter settings, including the hologram length (HL) values (53, 59, 61, 71, 83, 97, 151, 199, 257, 307, 353, and 401), and the fragment size (4–7) by default. Based on the default setting A/B/C of the fragment distinction, eight kinds of fragment distinction combinations are constituted after adding other fragment distinction parameters, and the combination modes are A/B/C, A/B/C/H, A/B/C/Ch, A/B/C/DA, A/B/C/H/Ch, A/B/C/H/DA, A/B/C/Ch/DA, and A/B/C/H/Ch/DA. Molecular hologram of



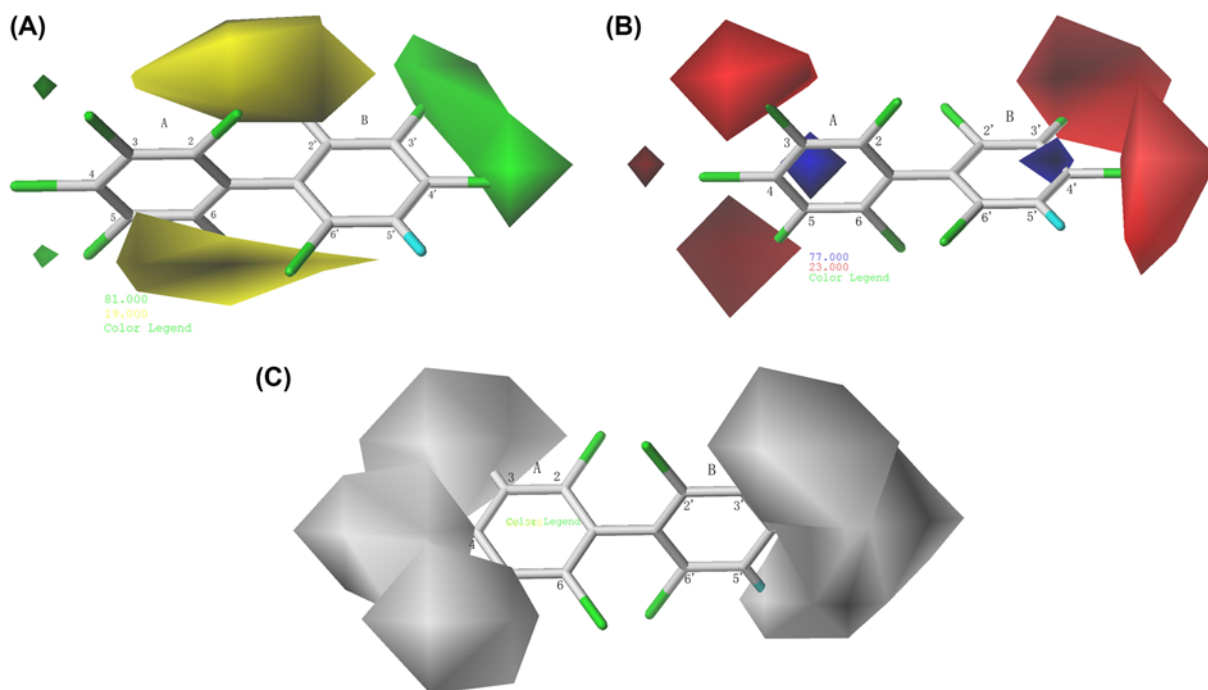

**Figure 4. Contour maps of CoMSIA model: (A) steric fields, (B) electrostatic fields, and (C) hydrophobic fields.**

Contour maps of CoMSIA model: (A) steric fields, (B) electrostatic fields, and (C) hydrophobic fields.

13 training set molecules and activity were used as the independent and dependent variables, respectively. A series of HQSAR models were obtained by taking linear regression analysis through PLS. Then, the prediction ability, stability, and fitting capacity of these models were validated by a high cross-validated correlation coefficient  $q^2$ , noncross-validated correlation coefficient  $r^2$  values, and a low-SEE along with a low cross-validated SEE ( $SE_{cv}$ ). The HQSAR analysis results can be graphically displayed in the form of contribution maps, in which the color coding of each atom reflects its contribution to the activity of the whole molecule. Hence, we can obtain the favorable information of molecular modification [22].

The substitution sites identified by HQSAR models that have a significant effect on the biological enrichment activity of the target molecular, combined with the distribution characteristics of the force field (hydrophobic field and hydrophobic group) that has a significant effect on the bioaccumulation of the target molecular determined by CoMSIA model of 3D-QSAR. It can precisely locate the low biological enrichment activity modified substitution sites and the substituent groups of target molecular, and then modify the target molecules.

## Molecular docking of PCBs with enzymes before and after molecular modification

In the present paper, the molecular docking was performed by using SYBYL-X 2.0 software from Tripos Company in the United States. The molecular docking of PCB-207/newly designed PCB-207 that have low biological enrichment with target protein of liver enzymes were both the docking that between small molecular and protein. Therefore, use Surflex-dock module by SYBYL software for the semiflexible docking [23,24]. Open the Surflex-dock module to correct and modify the protein that is about to carry on molecular docking, and extract the ligand from it to determine the binding sites. Set up docking pockets for the prepared protein, put the ligand molecules that are about to carry on molecular docking into the docking pocket, prepare for the molecular docking to take place. The evaluation standards of molecular docking results include Crash, Polar, and Total Score three expression functions. Crash represents the inadaptation of docking for the ligand into the receptor, the closer to 0 the better, that is the smaller the absolute value the better; Polar stands for the polarity function score, which the higher the scores the better when the binding molecule sites on the binding surface while the lower the scores the better when the binding site is inside the molecule; Total Score denotes the comprehensive score of above parameters, the higher the score the better. According to Total Score, it could be to determine the appropriateness of docking between molecules and proteins.

**Table 1** Statistical parameters and molecular field's contribution to PCBs  $K_{ow}$  of the CoMFA and CoMSIA models

| Model  | $q^2$ | $n$ | SEE   | $r^2$ | F       | $r^2_{pred}$ | SEP   | $Q^2$ | $Q^2_{ext}$ | cSDEP | $dq^2/dr^2yy$ | S      | E      | H      | D | A |
|--------|-------|-----|-------|-------|---------|--------------|-------|-------|-------------|-------|---------------|--------|--------|--------|---|---|
| CoMFA  | 0.784 | 2   | 0.215 | 0.954 | 72.595  | 0.896        | 0.301 | 0.715 | 0.996       | 0.525 | 1.625         | 33.90% | 66.10% | -      | - | - |
| CoMSIA | 0.883 | 2   | 0.177 | 0.969 | 108.026 | 0.937        | 0.234 | 0.787 | 0.891       | 0.452 | 1.309         | 0.90%  | 84.40% | 14.70% | 0 | 0 |

Abbreviations: A, hydrogen bond-acceptor; cSDEP, calculated cross-validated standard error of prediction; D, hydrogen bond-donor; E, electrostatic; F, Fisher test value; H, hydrophobic;  $n$ , optimum number of component;  $q^2$ , cross-validated correlation coefficient after the LOO procedure;  $Q^2_{ext}$ , the explained variance in prediction;  $r^2$ , noncross-validated correlation coefficient;  $r^2_{pred}$ , correlation coefficient for test set predictions; S, steric; SEP, standard error of prediction.

## Calculation methods of newly designed PCB molecules' functional properties

Quantum chemical descriptor of PCB-207 molecules and low biological enrichment newly designed PCB-207 molecules were calculated using Gaussian09, including energy gap (insulativity parameter) and C–Cl bond dissociation enthalpy (flame retardancy parameter). The geometry of all compounds was optimized using B3LYP/6-31g (d, p) level of density functional theory [25].

The calculation orbit (highest occupied molecular orbital (HOMO) and lowest unoccupied molecular orbital (LUMO)), which is significant to the study of molecular physics and chemical properties, is an important parameter of quantum chemistry. The energy gap, which is the energy difference of the HOMO and LUMO, is the required lowest energy of the electron excitation process, and is also an important parameter of conductivity and luminescence [25]. In addition, the larger the energy gap, the weaker the conductivity. The insulation information of newly designed molecules can be obtained by calculating the energy gap value.

By comparing the C–Cl bond dissociation enthalpy of PCB-207 molecules and low biological enrichment newly designed PCB-207 molecules, we obtained the flame retardancy information about low biological enrichment newly designed PCB-207 molecules. The lower the C–Cl bond dissociation enthalpy, indicating that the newly designed PCB-207 molecules after modification are more likely to release Cl-free radicals and HCl for inflaming retarding.

## Results and analysis

### Analysis, evaluation, and verification of PCBs molecular bioaccumulation based on CoMFA and CoMSIA model

The CoMFA in the 3D-QSAR model mainly reflects the non-bonding interaction between the drug molecules and the receptor, and is a widely used indirect drug design method. The steric fields' energy and electrostatic fields' energy are calculated using the Lennard-Jones and Coul potential energy functions. However, the lattice points of molecular surfaces are ignored due to the rapid increase in van der Waals repulsion. Compared with the CoMFA method, the CoMSIA method uses Gaussian similarity functions, which avoids drastic changes of the potential energy at the lattice points on the molecular surface, improves the sensitivity to the molecular alignment method and the spatial orientation, and increases hydrophobic fields in addition to hydrogen bond-donor and hydrogen bond-acceptor fields. The results of the CoMSIA method show a relatively small influence from compound matching rules and can more intuitively explain the quantitative structure–activity relationship of a compound. The use of CoMSIA can overcome inherent defects of CoMFA but does not necessarily gain better results [26]. Therefore, in this study, two methods (CoMFA and CoMSIA) were used to verify and supplement each other to gain reliable predicting models.

The statistical parameters of the CoMFA model and the CoMSIA model were shown in Table 1. According to Table 1, the CoMFA model and the CoMSIA model both had an optimum  $n$  of 2, the cross-validated  $q^2$  of 0.784, 0.883 ( $>0.5$ ), the SEE of 0.215, 0.177, the noncross-validated  $r^2$  of 0.954, 0.969 ( $>0.8$ ), the F-value of 72.595, 108.026, and the scrambling stability test parameters  $Q^2$  of 0.715, 0.787, cSDEP of 0.525, 0.452, and  $dQ^2/dr^2yy$  of 1.625, 1.309, respectively, illustrating that these two models had both suitable fitting predictive abilities [27,28].

As is shown in Table 1, the corresponding contribution percentages of the steric (S) and electrostatic (E) fields to the CoMFA model were 33.90 and 66.10%, respectively, indicating that the steric and electrostatic distributions of the groups may influence the  $K_{ow}$  values of the PCB homologs. Verifying electrostatic interaction was the major contribution to the  $\log K_{ow}$  of PCBs. The CoMSIA defines explicit hydrophobic and hydrogen-bond DA descriptors in addition to the steric and electrostatic fields in CoMFA. The contributions of the steric (S), electrostatic (E), hydrophobic (H), hydrogen bond-donor (D), and hydrogen bond-acceptor (A) fields to the CoMSIA model were 0.90, 84.40, 14.70, 0.0, and 0.00%, respectively.

Take above discussion into consideration, the steric distributions, electrostatic distributions, and hydrophobic properties of the groups may influence the  $K_{ow}$  values of the PCBs homologs, the electrostatic distribution had the most influence, and the hydrogen bond-donor and hydrogen bond-acceptor fields had no effect.

External validation was also conducted to further assess the reliabilities and the predictive ability of the built models. The test set with three compounds was used for this validation. The  $r^2_{pred}$  of 0.896 ( $>0.6$ ), 0.937 ( $>0.6$ ), the SEP of 0.301, 0.234, the  $Q^2_{ext}$  of 0.996 ( $>0.5$ ), 0.891 ( $>0.5$ ) were achieved, verifying the good external predictive ability of the two models [28]. The correlations between the experimental  $\log K_{ow}$  values and  $\log K_{ow}$  values predicted by the CoMFA and CoMSIA models are depicted in Figure 1A,B, respectively. In further analysis of the scatter plot of experimental versus  $\log K_{ow}$  values predicted by the CoMFA and CoMSIA models revealed a fine linear dependence ( $r^2$  of 0.9579 and 0.9641, respectively) among experimental values and predicted values, all data were concentrated around the trend line. And the slopes of the linear equations for experimental and predicted values were 0.96105 and 0.96343, respectively, which can be observed from the scatter plot of experimental versus predicted values of  $\log K_{ow}$ , which can be observed from the scatter plot of experimental versus predicted values of  $\log K_{ow}$ , which indicates the two models have good internal prediction ability and can be used for the prediction of PCBs  $K_{ow}$  values.

## Prediction of PCBs $\log K_{ow}$ based on CoMFA and CoMSIA models

CoMFA and CoMSIA models were used to predict 209 types of PCBs, and the experimental and predicted  $\log K_{ow}$  values and standard deviations for the PCBs are given in Table 2.

From Table 2, in the CoMFA and CoMSIA model prediction, the relative errors of the test set (3 compounds) were 0.12, 2.20, 6.41% and 2.86, 1.72, 7.31%, respectively, which are acceptable for small base values.

## Substitution sites determination of $\log K_{ow}$ value PCBs molecular based on 3D-QSAR/HQSAR models

### PCBs low biological enrichment substitution sites analysis based on HQSAR model

Based on the default setting A/B/C of the fragment distinction, eight kinds of fragment distinction combinations (A/B/C, A/B/C/H, A/B/C/Ch, A/B/C/DA, A/B/C/H/Ch, A/B/C/H/DA, A/B/C/Ch/DA, and A/B/C/H/Ch/DA.) are constituted after adding other fragment distinction parameters. The statistical results of the PLS analyses for the training set using different fragment distinctions in combinations with default fragment size (4–7) and 12 default hologram lengths (53, 59, 61, 71, 83, 97, 151, 199, 257, 307, 353, and 401) were summarized in Table 3.

It can be seen from Table 3 that each parameter result of fragment distinction combinations among A/B/C and A/B/C/Ch, A/B/C/DA, A/B/C/Ch/DA was exactly the same, and each parameter result was identical for fragment distinction combinations A/B/C/H and A/B/C/H/Ch, A/B/C/H/DA, A/B/C/H/Ch/DA, indicating that the fragment distinction parameter Ch cannot distinguish the fragment, and it will not make any differences in Ch of molecules with the introduction of fragment distinction parameter DA. That is to say, PCBs molecules do not contain chiral atoms, by the same token, the fragment distinction parameter DA cannot distinguish fragments, and the introduction of fragment distinction parameter Ch did not make the statistical results of model differences, that is, there were no hydrogen bond donor atoms and hydrogen bond acceptor atoms in PCB molecules. This result is the same as that of the CoMFA model, confirming each other.

It was found that the  $r^2$  of above eight fragment distinction combinations were greater than 0.8, and  $q^2$  were greater than 0.5. Often, a high value of this statistical characteristic ( $r^2 > 0.8$ ,  $q^2 > 0.5$ ) is considered as a proof of the high predictive ability of the model. Taking into account the predictive SEE and  $SE_{cv}$  values, A/B/C/H was proved as the most effective fragment distinction combinations to build the HQSAR model. According to HQSAR contribution maps, we can get the favorable information for molecular modification.

As shown in Figure 2B, the order of color about the contribution to activity is: green > green blue > yellow > white > orange > red orange > red. The color from green to red represents the positive contribution (PC) to negative contribution to the activity. As can be seen from Figure 2, the green-labeled  $Cl_4$ ,  $Cl_5$ ,  $Cl_6$  molecular Cl-substitutions have a PC to the bioaccumulation activity.

### CoMFA and CoMSIA 3D contour map analysis

Taking the most active compound PCB-207 as an example, the properties of PCB molecules were analyzed by using 3D contour map of the model. The steric field is denoted by yellow and green colored contours, where the yellow regions represent the small volume groups near these regions favorable to  $\log K_{ow}$ , and the green regions indicate that the sterically bulkier substituents close to these regions may increase  $\log K_{ow}$ . In the electrostatic field, blue-colored

**Table 2 Predicted log<sub>K<sub>ow</sub></sub> values of PCBs through CoMFA and CoMSIA models**

| Number          | Compounds                     | Obs. | CoMFA |                    | CoMSIA |                   |
|-----------------|-------------------------------|------|-------|--------------------|--------|-------------------|
|                 |                               |      | Pred. | Relative error (%) | Pred.  | Relative error(%) |
| 1               | 2-Chlorobiphenyl              |      | 5.443 |                    | 5.097  |                   |
| 2               | 3-Chlorobiphenyl              |      | 4.921 |                    | 4.804  |                   |
| 3               | 4-Chlorobiphenyl              |      | 5.130 |                    | 4.962  |                   |
| 4               | 2,2'-Dichlorobiphenyl         |      | 5.175 |                    | 4.897  |                   |
| 5               | 2,3-Dichlorobiphenyl          |      | 5.385 |                    | 5.215  |                   |
| 6               | 2,3'-Dichlorobiphenyl         |      | 5.444 |                    | 5.357  |                   |
| 7               | 2,4-Dichlorobiphenyl          |      | 5.296 |                    | 5.310  |                   |
| 8               | 2,4'-Dichlorobiphenyl         |      | 5.335 |                    | 5.256  |                   |
| 9               | 2,5-Dichlorobiphenyl          |      | 5.344 |                    | 5.217  |                   |
| 10              | 2,6-Dichlorobiphenyl          |      | 5.054 |                    | 4.890  |                   |
| 11              | 3,3'-Dichlorobiphenyl         |      | 5.540 |                    | 5.363  |                   |
| 12              | 3,4-Dichlorobiphenyl          |      | 5.807 |                    | 5.549  |                   |
| 13              | 3,4'-Dichlorobiphenyl         |      | 5.506 |                    | 5.469  |                   |
| 14              | 3,5-Dichlorobiphenyl          |      | 5.658 |                    | 5.505  |                   |
| 15              | 4,4'-Dichlorobiphenyl         |      | 5.818 |                    | 5.603  |                   |
| 16              | 2,2',3-Trichlorobiphenyl      |      | 5.610 |                    | 5.320  |                   |
| 17              | 2,2',4-Trichlorobiphenyl      |      | 5.602 |                    | 5.349  |                   |
| 18              | 2,2',5-Trichlorobiphenyl      |      | 5.640 |                    | 5.310  |                   |
| 19              | 2,2',6-Trichlorobiphenyl      |      | 5.548 |                    | 5.166  |                   |
| 20              | 2,3,3'-Trichlorobiphenyl      |      | 6.342 |                    | 5.730  |                   |
| 21              | 2,3,4-Trichlorobiphenyl       |      | 5.942 |                    | 5.770  |                   |
| 22              | 2,3,4'-Trichlorobiphenyl      |      | 5.799 |                    | 5.667  |                   |
| 23              | 2,3,5-Trichlorobiphenyl       |      | 5.974 |                    | 5.653  |                   |
| 24              | 2,3,6-Trichlorobiphenyl       |      | 5.816 |                    | 5.507  |                   |
| 25              | 2,3',4-Trichlorobiphenyl      |      | 5.897 |                    | 5.633  |                   |
| 26              | 2,3',5-Trichlorobiphenyl      |      | 5.612 |                    | 5.500  |                   |
| 27              | 2,3',6-Trichlorobiphenyl      |      | 5.183 |                    | 5.258  |                   |
| 28              | 2,4,4'-Trichlorobiphenyl      |      | 5.710 |                    | 5.761  |                   |
| 29              | 2,4,5-Trichlorobiphenyl       |      | 5.714 |                    | 5.721  |                   |
| 30              | 2,4,6-Trichlorobiphenyl       |      | 5.470 |                    | 5.342  |                   |
| 31              | 2,4',5-Trichlorobiphenyl      |      | 5.759 |                    | 5.669  |                   |
| 32              | 2,4',6-Trichlorobiphenyl      |      | 5.429 |                    | 5.395  |                   |
| 33              | 2,3',4'-Trichlorobiphenyl     |      | 5.854 |                    | 5.805  |                   |
| 34              | 2,3',5'-Trichlorobiphenyl     |      | 5.571 |                    | 5.676  |                   |
| 35              | 3,3',4-Trichlorobiphenyl      |      | 5.913 |                    | 5.867  |                   |
| 36              | 3,3',5-Trichlorobiphenyl      |      | 5.947 |                    | 5.771  |                   |
| 37              | 3,4,4'-Trichlorobiphenyl      |      | 6.224 |                    | 6.001  |                   |
| 38              | 3,4,5-Trichlorobiphenyl       |      | 6.068 |                    | 5.952  |                   |
| 39              | 3,4',5-Trichlorobiphenyl      |      | 6.034 |                    | 6.012  |                   |
| 40 <sup>1</sup> | 2,2',3,3'-Tetrachlorobiphenyl | 5.55 | 5.738 | 3.39%              | 5.693  | 2.58%             |
| 41              | 2,2',3,4-Tetrachlorobiphenyl  |      | 5.992 |                    | 5.823  |                   |
| 42              | 2,2',3,4'-Tetrachlorobiphenyl |      | 6.037 |                    | 5.772  |                   |
| 43              | 2,2',3,5-Tetrachlorobiphenyl  |      | 6.078 |                    | 5.733  |                   |
| 44              | 2,2',3,5'-Tetrachlorobiphenyl |      | 6.154 |                    | 5.880  |                   |
| 45              | 2,2',3,6-Tetrachlorobiphenyl  |      | 5.515 |                    | 5.492  |                   |
| 46              | 2,2',3,6'-Tetrachlorobiphenyl |      | 5.644 |                    | 5.460  |                   |
| 47              | 2,2',4,4'-Tetrachlorobiphenyl |      | 5.989 |                    | 5.854  |                   |
| 48              | 2,2',4,5-Tetrachlorobiphenyl  |      | 6.141 |                    | 5.906  |                   |
| 49              | 2,2',4,5'-Tetrachlorobiphenyl |      | 6.067 |                    | 5.762  |                   |
| 50              | 2,2',4,6-Tetrachlorobiphenyl  |      | 5.452 |                    | 5.572  |                   |
| 51              | 2,2',4,6'-Tetrachlorobiphenyl |      | 5.491 |                    | 5.519  |                   |
| 52              | 2,2',5,5'-Tetrachlorobiphenyl |      | 6.185 |                    | 5.870  |                   |
| 53 <sup>1</sup> | 2,2',5,6'-Tetrachlorobiphenyl | 5.46 | 5.656 | 3.59%              | 5.446  | 0.26%             |
| 54 <sup>1</sup> | 2,2',6,6'-Tetrachlorobiphenyl | 5.48 | 5.114 | 6.68%              | 5.209  | 4.95%             |

**Continued over**



**Table 2 Predicted log<sub>K<sub>ow</sub></sub> values of PCBs through CoMFA and CoMSIA models (Continued)**

| Number           | Compounds                        | Obs. | CoMFA |                    | CoMSIA |                   |
|------------------|----------------------------------|------|-------|--------------------|--------|-------------------|
|                  |                                  |      | Pred. | Relative error (%) | Pred.  | Relative error(%) |
| 55               | 2,3,3',4-Tetrachlorobiphenyl     |      | 6.399 |                    | 6.182  |                   |
| 56               | 2,3,3',4'-Tetrachlorobiphenyl    |      | 6.319 |                    | 6.216  |                   |
| 57               | 2,3,3',5-Tetrachlorobiphenyl     |      | 6.335 |                    | 6.181  |                   |
| 58               | 2,3,3',5'-Tetrachlorobiphenyl    |      | 6.035 |                    | 6.087  |                   |
| 59               | 2,3,3',6-Tetrachlorobiphenyl     |      | 5.606 |                    | 5.677  |                   |
| 60               | 2,3,4,4'-Tetrachlorobiphenyl     |      | 6.316 |                    | 6.276  |                   |
| 61 <sup>1</sup>  | 2,3,4,5-Tetrachlorobiphenyl      | 6.18 | 6.067 | 1.83%              | 6.087  | 1.50%             |
| 62               | 2,3,4,6-Tetrachlorobiphenyl      |      | 5.995 |                    | 5.895  |                   |
| 63               | 2,3,4',5-Tetrachlorobiphenyl     |      | 6.226 |                    | 6.081  |                   |
| 64               | 2,3,4',6-Tetrachlorobiphenyl     |      | 5.959 |                    | 5.951  |                   |
| 65 <sup>2</sup>  | 2,3,5,6-Tetrachlorobiphenyl      | 5.94 | 5.947 | 0.12%              | 5.770  | 2.86%             |
| 66 <sup>1</sup>  | 2,3',4,4'-Tetrachlorobiphenyl    | 6.31 | 6.229 | 1.28%              | 6.311  | 0.02%             |
| 67               | 2,3',4,5-Tetrachlorobiphenyl     |      | 6.237 |                    | 6.273  |                   |
| 68               | 2,3',4,5'-Tetrachlorobiphenyl    |      | 5.945 |                    | 6.182  |                   |
| 69               | 2,3',4,6-Tetrachlorobiphenyl     |      | 6.296 |                    | 6.239  |                   |
| 70               | 2,3',4',5-Tetrachlorobiphenyl    |      | 6.278 |                    | 6.219  |                   |
| 71               | 2,3',4',6-Tetrachlorobiphenyl    |      | 5.852 |                    | 5.813  |                   |
| 72               | 2,3',5,5'-Tetrachlorobiphenyl    |      | 5.994 |                    | 6.089  |                   |
| 73               | 2,3',5',6-Tetrachlorobiphenyl    |      | 5.938 |                    | 5.723  |                   |
| 74               | 2,4,4',5-Tetrachlorobiphenyl     |      | 6.130 |                    | 6.172  |                   |
| 75               | 2,4,4',6-Tetrachlorobiphenyl     |      | 5.844 |                    | 5.847  |                   |
| 76               | 2,3',4',5'-Tetrachlorobiphenyl   |      | 5.981 |                    | 6.122  |                   |
| 77 <sup>1</sup>  | 3,3',4,4'-Tetrachlorobiphenyl    | 6.21 | 6.327 | 1.88%              | 6.317  | 1.72%             |
| 78               | 3,3',4,5-Tetrachlorobiphenyl     |      | 6.479 |                    | 6.353  |                   |
| 79               | 3,3',4,5'-Tetrachlorobiphenyl    |      | 6.440 |                    | 6.409  |                   |
| 80               | 3,3',5,5'-Tetrachlorobiphenyl    |      | 6.475 |                    | 6.313  |                   |
| 81               | 3,4,4',5-Tetrachlorobiphenyl     |      | 6.444 |                    | 6.458  |                   |
| 82               | 2,2',3,3',4-Pentachlorobiphenyl  |      | 6.120 |                    | 6.141  |                   |
| 83               | 2,2',3,3',5-Pentachlorobiphenyl  |      | 6.206 |                    | 6.051  |                   |
| 84               | 2,2',3,3',6-Pentachlorobiphenyl  |      | 5.639 |                    | 5.811  |                   |
| 85               | 2,2',3,4,4'-Pentachlorobiphenyl  |      | 6.419 |                    | 6.274  |                   |
| 86               | 2,2',3,4,5-Pentachlorobiphenyl   |      | 6.458 |                    | 6.233  |                   |
| 87               | 2,2',3,4,5'-Pentachlorobiphenyl  |      | 6.537 |                    | 6.382  |                   |
| 88               | 2,2',3,4,6-Pentachlorobiphenyl   |      | 6.894 |                    | 5.995  |                   |
| 89               | 2,2',3,4,6'-Pentachlorobiphenyl  |      | 6.323 |                    | 6.158  |                   |
| 90               | 2,2',3,4',5-Pentachlorobiphenyl  |      | 6.505 |                    | 6.185  |                   |
| 91               | 2,2',3,4',6-Pentachlorobiphenyl  |      | 6.939 |                    | 5.944  |                   |
| 92               | 2,2',3,5,5'-Pentachlorobiphenyl  |      | 6.632 |                    | 6.293  |                   |
| 93               | 2,2',3,5,6-Pentachlorobiphenyl   |      | 5.985 |                    | 5.904  |                   |
| 94               | 2,2',3,5,6'-Pentachlorobiphenyl  |      | 6.033 |                    | 6.077  |                   |
| 95               | 2,2',3,5',6-Pentachlorobiphenyl  |      | 6.063 |                    | 6.053  |                   |
| 96               | 2,2',3,6,6'-Pentachlorobiphenyl  |      | 5.574 |                    | 5.620  |                   |
| 97               | 2,2',3,4',5'-Pentachlorobiphenyl |      | 6.577 |                    | 6.329  |                   |
| 98               | 2,2',3,4',6'-Pentachlorobiphenyl |      | 6.066 |                    | 5.912  |                   |
| 99               | 2,2',4,4',5-Pentachlorobiphenyl  |      | 6.528 |                    | 6.411  |                   |
| 100              | 2,2',4,4',6-Pentachlorobiphenyl  |      | 5.877 |                    | 6.024  |                   |
| 101              | 2,2',4,5,5'-Pentachlorobiphenyl  |      | 6.607 |                    | 6.319  |                   |
| 102              | 2,2',4,5,6'-Pentachlorobiphenyl  |      | 6.220 |                    | 6.113  |                   |
| 103              | 2,2',4,5',6-Pentachlorobiphenyl  |      | 6.078 |                    | 5.898  |                   |
| 104 <sup>1</sup> | 2,2',4,6,6'-Pentachlorobiphenyl  | 5.37 | 5.532 | 3.02%              | 5.661  | 5.42%             |
| 105 <sup>2</sup> | 2,3,3',4,4'-Pentachlorobiphenyl  | 5.82 | 5.692 | 2.20%              | 5.720  | 1.72%             |
| 106              | 2,3,3',4,5-Pentachlorobiphenyl   |      | 6.525 |                    | 6.499  |                   |
| 107              | 2,3,3',4',5-Pentachlorobiphenyl  |      | 6.746 |                    | 6.630  |                   |
| 108              | 2,3,3',4,5'-Pentachlorobiphenyl  |      | 6.827 |                    | 5.596  |                   |

Continued over

**Table 2 Predicted log<sub>K<sub>ow</sub></sub> values of PCBs through CoMFA and CoMSIA models (Continued)**

| Number           | Compounds                         | Obs. | CoMFA |                    | CoMSIA |                   |
|------------------|-----------------------------------|------|-------|--------------------|--------|-------------------|
|                  |                                   |      | Pred. | Relative error (%) | Pred.  | Relative error(%) |
| 109              | 2,3,3',4,6-Pentachlorobiphenyl    |      | 5.978 |                    | 6.180  |                   |
| 110              | 2,3,3',4',6-Pentachlorobiphenyl   |      | 5.980 |                    | 6.132  |                   |
| 111              | 2,3,3',5,5'-Pentachlorobiphenyl   |      | 6.462 |                    | 6.500  |                   |
| 112              | 2,3,3',5,6-Pentachlorobiphenyl    |      | 6.070 |                    | 6.089  |                   |
| 113              | 2,3,3',5',6-Pentachlorobiphenyl   |      | 6.470 |                    | 6.279  |                   |
| 114              | 2,3,4,4',5-Pentachlorobiphenyl    |      | 6.441 |                    | 5.593  |                   |
| 115              | 2,3,4,4',6-Pentachlorobiphenyl    |      | 6.370 |                    | 6.400  |                   |
| 116              | 2,3,4,5,6-Pentachlorobiphenyl     |      | 6.123 |                    | 6.212  |                   |
| 117              | 2,3,4',5,6-Pentachlorobiphenyl    |      | 6.366 |                    | 6.222  |                   |
| 118              | 2,3',4,4',5-Pentachlorobiphenyl   |      | 6.648 |                    | 6.722  |                   |
| 119              | 2,3',4,4',6-Pentachlorobiphenyl   |      | 6.355 |                    | 6.628  |                   |
| 120              | 2,3',4,5,5'-Pentachlorobiphenyl   |      | 6.365 |                    | 6.592  |                   |
| 121              | 2,3',4,5',6-Pentachlorobiphenyl   |      | 6.356 |                    | 6.175  |                   |
| 122              | 2,3,3',4',5'-Pentachlorobiphenyl  |      | 6.445 |                    | 6.533  |                   |
| 123              | 2,3',4,4',5'-Pentachlorobiphenyl  |      | 6.355 |                    | 6.628  |                   |
| 124              | 2,3,4',5,5'-Pentachlorobiphenyl   |      | 6.454 |                    | 6.558  |                   |
| 125              | 2,3',4',5',6-Pentachlorobiphenyl  |      | 6.127 |                    | 6.261  |                   |
| 126              | 3,3',4,4',5-Pentachlorobiphenyl   |      | 6.851 |                    | 6.856  |                   |
| 127              | 3,3',4,5,5'-Pentachlorobiphenyl   |      | 6.888 |                    | 6.759  |                   |
| 128              | 2,2',3,3',4,4'-Hexachlorobiphenyl |      | 6.548 |                    | 6.591  |                   |
| 129              | 2,2',3,3',4,5-Hexachlorobiphenyl  |      | 6.706 |                    | 6.646  |                   |
| 130              | 2,2',3,3',4,5'-Hexachlorobiphenyl |      | 6.664 |                    | 6.701  |                   |
| 131              | 2,2',3,3',4,6-Hexachlorobiphenyl  |      | 6.018 |                    | 6.313  |                   |
| 132              | 2,2',3,3',4,6'-Hexachlorobiphenyl |      | 6.138 |                    | 6.280  |                   |
| 133              | 2,2',3,3',5,5'-Hexachlorobiphenyl |      | 6.750 |                    | 6.611  |                   |
| 134              | 2,2',3,3',5,6-Hexachlorobiphenyl  |      | 6.125 |                    | 6.223  |                   |
| 135              | 2,2',3,3',5,6'-Hexachlorobiphenyl |      | 6.187 |                    | 6.371  |                   |
| 136 <sup>2</sup> | 2,2',3,3',6,6'-Hexachlorobiphenyl | 5.76 | 6.129 | 6.41%              | 6.181  | 7.31%             |
| 137              | 2,2',3,4,4',5-Hexachlorobiphenyl  |      | 6.885 |                    | 6.685  |                   |
| 138              | 2,2',3,4,4',5'-Hexachlorobiphenyl |      | 6.959 |                    | 6.831  |                   |
| 139              | 2,2',3,4,4',6-Hexachlorobiphenyl  |      | 6.318 |                    | 6.446  |                   |
| 140              | 2,2',3,4,4',6'-Hexachlorobiphenyl |      | 6.439 |                    | 6.414  |                   |
| 141              | 2,2',3,4,5,5'-Hexachlorobiphenyl  |      | 7.003 |                    | 6.793  |                   |
| 142              | 2,2',3,4,5,6-Hexachlorobiphenyl   |      | 6.362 |                    | 6.404  |                   |
| 143              | 2,2',3,4,5,6'-Hexachlorobiphenyl  |      | 6.470 |                    | 6.372  |                   |
| 144              | 2,2',3,4,5',6-Hexachlorobiphenyl  |      | 6.441 |                    | 6.555  |                   |
| 145              | 2,2',3,4,6,6'-Hexachlorobiphenyl  |      | 6.075 |                    | 6.219  |                   |
| 146              | 2,2',3,4',5,5'-Hexachlorobiphenyl |      | 7.046 |                    | 6.742  |                   |
| 147              | 2,2',3,4',5,6-Hexachlorobiphenyl  |      | 6.409 |                    | 6.356  |                   |
| 148              | 2,2',3,4',5,6'-Hexachlorobiphenyl |      | 6.522 |                    | 6.325  |                   |
| 149              | 2,2',3,4',5',6-Hexachlorobiphenyl |      | 6.481 |                    | 6.502  |                   |
| 150              | 2,2',3,4',6,6'-Hexachlorobiphenyl |      | 5.991 |                    | 6.072  |                   |
| 151              | 2,2',3,5,5',6-Hexachlorobiphenyl  |      | 6.534 |                    | 6.465  |                   |
| 152              | 2,2',3,5,6,6'-Hexachlorobiphenyl  |      | 6.012 |                    | 6.049  |                   |
| 153              | 2,2',4,4',5,5'-Hexachlorobiphenyl |      | 6.992 |                    | 6.821  |                   |
| 154              | 2,2',4,4',5,6'-Hexachlorobiphenyl |      | 6.330 |                    | 6.427  |                   |
| 155              | 2,2',4,4',6,6'-Hexachlorobiphenyl |      | 6.908 |                    | 6.166  |                   |
| 156              | 2,3,3',4,4',5-Hexachlorobiphenyl  |      | 7.115 |                    | 7.131  |                   |
| 157              | 2,3,3',4,4',5'-Hexachlorobiphenyl |      | 7.196 |                    | 7.097  |                   |
| 158              | 2,3,3',4,4',6-Hexachlorobiphenyl  |      | 6.397 |                    | 6.630  |                   |
| 159              | 2,3,3',4,5,5'-Hexachlorobiphenyl  |      | 6.830 |                    | 7.001  |                   |
| 160              | 2,3,3',4,5,6-Hexachlorobiphenyl   |      | 6.441 |                    | 6.589  |                   |
| 161              | 2,3,3',4,5',6-Hexachlorobiphenyl  |      | 6.884 |                    | 6.727  |                   |
| 162              | 2,3,3',4',5,5'-Hexachlorobiphenyl |      | 6.872 |                    | 6.947  |                   |

**Continued over**

**Table 2 Predicted log $K_{ow}$  values of PCBs through CoMFA and CoMSIA models (Continued)**

| Number           | Compounds                                | Obs. | CoMFA |                    | CoMSIA |                   |
|------------------|------------------------------------------|------|-------|--------------------|--------|-------------------|
|                  |                                          |      | Pred. | Relative error (%) | Pred.  | Relative error(%) |
| 163              | 2,3,3',4',5,6-Hexachlorobiphenyl         |      | 6.489 |                    | 6.539  |                   |
| 164              | 2,3,3',4',5',6-Hexachlorobiphenyl        |      | 6.589 |                    | 6.673  |                   |
| 165              | 2,3,3',5,5',6-Hexachlorobiphenyl         |      | 6.602 |                    | 6.646  |                   |
| 166              | 2,3,4,4',5,6-Hexachlorobiphenyl          |      | 6.736 |                    | 6.723  |                   |
| 167              | 2,3',4,4',5,5'-Hexachlorobiphenyl        |      | 6.775 |                    | 7.039  |                   |
| 168              | 2,3',4,4',5',6-Hexachlorobiphenyl        |      | 6.726 |                    | 6.675  |                   |
| 169              | 3,3',4,4',5,5'-Hexachlorobiphenyl        |      | 7.262 |                    | 7.261  |                   |
| 170              | 2,2',3,3',4,4',5-Heptachlorobiphenyl     |      | 7.087 |                    | 7.148  |                   |
| 171              | 2,2',3,3',4,4',6-Heptachlorobiphenyl     |      | 6.458 |                    | 6.763  |                   |
| 172              | 2,2',3,3',4,5,5'-Heptachlorobiphenyl     |      | 7.174 |                    | 7.059  |                   |
| 173              | 2,2',3,3',4,5,6-Heptachlorobiphenyl      |      | 6.500 |                    | 6.722  |                   |
| 174              | 2,2',3,3',4,5,6'-Heptachlorobiphenyl     |      | 6.606 |                    | 6.818  |                   |
| 175              | 2,2',3,3',4,5',6-Heptachlorobiphenyl     |      | 6.566 |                    | 6.874  |                   |
| 176              | 2,2',3,3',4,6,6'-Heptachlorobiphenyl     |      | 6.536 |                    | 6.630  |                   |
| 177              | 2,2',3,3',4,5',6'-Heptachlorobiphenyl    |      | 6.701 |                    | 6.840  |                   |
| 178              | 2,2',3,3',5,5',6-Heptachlorobiphenyl     |      | 6.658 |                    | 6.783  |                   |
| 179              | 2,2',3,3',5,6,6'-Heptachlorobiphenyl     |      | 6.567 |                    | 6.610  |                   |
| 180              | 2,2',3,4,4',5,5'-Heptachlorobiphenyl     |      | 7.426 |                    | 7.242  |                   |
| 181              | 2,2',3,4,4',5,6-Heptachlorobiphenyl      |      | 6.786 |                    | 6.856  |                   |
| 182              | 2,2',3,4,4',5,6'-Heptachlorobiphenyl     |      | 6.892 |                    | 6.824  |                   |
| 183              | 2,2',3,4,4',5',6-Heptachlorobiphenyl     |      | 6.860 |                    | 7.004  |                   |
| 184              | 2,2',3,4,4',6,6'-Heptachlorobiphenyl     |      | 6.667 |                    | 6.805  |                   |
| 185              | 2,2',3,3',5,5',6-Heptachlorobiphenyl     |      | 6.890 |                    | 6.631  |                   |
| 186              | 2,2',3,4,5,6,6'-Heptachlorobiphenyl      |      | 6.790 |                    | 6.914  |                   |
| 187              | 2,2',3,4',5,5',6-Heptachlorobiphenyl     |      | 6.953 |                    | 6.501  |                   |
| 188              | 2,2',3,4',5,6,6'-Heptachlorobiphenyl     |      | 6.430 |                    | 7.447  |                   |
| 189              | 2,3,3',4,4',5,5'-Heptachlorobiphenyl     |      | 7.241 |                    | 7.135  |                   |
| 190              | 2,3,3',4,4',5,6-Heptachlorobiphenyl      |      | 6.919 |                    | 7.228  |                   |
| 191              | 2,3,3',4,4',5',6-Heptachlorobiphenyl     |      | 7.251 |                    | 7.146  |                   |
| 192              | 2,3,3',4,5,5',6-Heptachlorobiphenyl      |      | 6.972 |                    | 7.093  |                   |
| 193              | 2,3,3',4',5,5',6-Heptachlorobiphenyl     |      | 7.016 |                    | 7.558  |                   |
| 194 <sup>1</sup> | 2,2',3,3',4,4',5,5'-Octachlorobiphenyl   | 7.67 | 7.554 | 1.51%              | 7.558  | 1.46%             |
| 195              | 2,2',3,3',4,4',5,6-Octachlorobiphenyl    |      | 7.114 |                    | 7.287  |                   |
| 196              | 2,2',3,3',4,4',5,6'-Octachlorobiphenyl   |      | 6.985 |                    | 7.321  |                   |
| 197              | 2,2',3,3',4,4',6,6'-Octachlorobiphenyl   |      | 7.144 |                    | 7.191  |                   |
| 198              | 2,2',3,3',4,5,5',6-Octachlorobiphenyl    |      | 7.219 |                    | 7.336  |                   |
| 199              | 2,2',3,3',4,5,5',6'-Octachlorobiphenyl   |      | 7.291 |                    | 7.267  |                   |
| 200              | 2,2',3,3',4,5,6,6'-Octachlorobiphenyl    |      | 7.201 |                    | 7.177  |                   |
| 201 <sup>1</sup> | 2,2',3,3',4,5',6,6'-Octachlorobiphenyl   | 7.21 | 7.173 | 0.51%              | 7.104  | 1.47%             |
| 202              | 2,2',3,3',5,5',6,6'-Octachlorobiphenyl   |      | 6.685 |                    | 6.928  |                   |
| 203              | 2,2',3,4,4',5,5',6-Octachlorobiphenyl    |      | 7.551 |                    | 7.465  |                   |
| 204              | 2,2',3,4,4',5,6,6'-Octachlorobiphenyl    |      | 7.163 |                    | 7.084  |                   |
| 205              | 2,3,3',4,4',5,5',6-Octachlorobiphenyl    |      | 7.380 |                    | 7.593  |                   |
| 206              | 2,2',3,3',4,4',5,5',6-Nonachlorobiphenyl |      | 7.566 |                    | 7.697  |                   |
| 207 <sup>1</sup> | 2,2',3,3',4,4',5,6,6'-Nonachlorobiphenyl | 7.52 | 7.571 | 0.68%              | 7.627  | 1.42%             |
| 208              | 2,2',3,3',4,5,5',6,6'-Nonachlorobiphenyl |      | 7.091 |                    | 7.375  |                   |
| 209              | Decachlorobiphenyl                       |      | 7.461 |                    | 7.875  |                   |

<sup>1</sup>Training set.  
<sup>2</sup>Test set.

**Table 3** HQSAR model for distinguishing parameters of different fragments

| Model    | Fragment distinction | Fragment size | r <sup>2</sup> | q <sup>2</sup> | SEE          | SE <sub>cv</sub> | HL        |
|----------|----------------------|---------------|----------------|----------------|--------------|------------------|-----------|
| 1        | A/B/C                |               | 0.895          | 0.817          | 0.281        | 0.371            | 257       |
| <b>2</b> | <b>A/B/C/H</b>       |               | <b>0.905</b>   | <b>0.835</b>   | <b>0.255</b> | <b>0.336</b>     | <b>61</b> |
| 3        | A/B/C/Ch             |               | 0.895          | 0.817          | 0.281        | 0.371            | 257       |
| 4        | A/B/C/DA             | 4–7           | 0.895          | 0.817          | 0.281        | 0.371            | 257       |
| 5        | A/B/C/H/Ch           |               | 0.905          | 0.835          | 0.255        | 0.336            | 61        |
| 6        | A/B/C/H/DA           |               | 0.905          | 0.835          | 0.255        | 0.336            | 61        |
| 7        | A/B/C/Ch/DA          |               | 0.895          | 0.817          | 0.281        | 0.371            | 257       |
| 8        | A/B/C/H/Ch/DA        |               | 0.905          | 0.835          | 0.255        | 0.336            | 61        |

Fragment distinction, A-atom types, B-bond types, C-connectivity, H-hydrogens, Ch-chirality, DA-donor and acceptor. Abbreviations: q<sup>2</sup>, squared cross-validated correlation coefficient; r<sup>2</sup>, squared multiple correlation coefficients; SEE, noncross-validated standard error. The bold indicates the optimal fragment distinction combinations.

contours represent regions where the positive charge increases the logK<sub>ow</sub> values, whereas red-colored regions display areas where the negative charge enhances the logK<sub>ow</sub> values. Moreover, the yellow and white contours depict hydrophobic and hydrophilic favored regions, respectively. To visualize the field effects on the target compounds in 3D space, the contour diagrams of the final CoMFA and CoMSIA models are shown in Figure 3.

The 3D contour maps of CoMFA model were seen from Figure 3. In steric fields (Figure 3A), large yellow contours located at the 3, 4, 5-positions of the A ring and 3', 4'-positions of B ring and indicated that the sterically smaller substituent is favored at these positions. A medium-sized region of yellow contour covered the 6'-position of the B ring, indicating that these positions were preferred for smaller substituents to increase logK<sub>ow</sub>, that is, increase its solubility in organic phase, reduce its solubility in water, as illustrated by the fact that the logK<sub>ow</sub> value of PCB-207 was stronger than that of compound PCB-201, that is to say, introducing bulky Cl-substituent that at site 5 decreased the solubility of PCBs in the organic phase. Cl<sub>2</sub>, Cl<sub>4</sub>, Cl<sub>5</sub>, Cl<sub>6</sub>, Cl<sub>3'</sub>, Cl<sub>6'</sub> atoms were located in the blue contours of the electrostatic contour map, and Cl<sub>3</sub>, Cl<sub>3'</sub>, Cl<sub>4'</sub> atoms were located in the red contours of the electrostatic contour map (Figure 3B), indicating that imbedding electron withdrawing groups at 2, 4, 5, 6, 3', 6'-positions and imbedding electronegative groups at 3, 3', 4'-positions can increase the logK<sub>ow</sub> of PCBs. The higher logK<sub>ow</sub> of PCB-194 compared with PCB-207 was an example of such a case.

As shown in Figure 4, Cl<sub>2</sub>, Cl<sub>2'</sub> atoms and carbon skeleton near the Cl<sub>5</sub>, Cl<sub>6</sub>, Cl<sub>6'</sub> atoms were located in yellow contours of the steric contour map, Cl<sub>3'</sub>, Cl<sub>4</sub>, atoms were located in green contours of the steric contour map, and the small green colored contours were mapped near the 3- and 5-positions, indicating that small volume groups at 2-, 2'-positions and bulkier groups at 3-, 5-, 3', 4'-positions may increase logK<sub>ow</sub>. In electrostatic fields, two small blue colored contours were mapped the carbon skeleton near the Cl<sub>4</sub> and Cl<sub>4'</sub> atoms, the 3-, 4-, 5-, 3', and 4'-positions are encompassed by medium-sized region of red contours, representing the electronegative groups at 3-, 4-, 5-, 3', 4'-Substitution were favorable to increase logK<sub>ow</sub> of PCBs. According to Figure 4C, two large white contour located at the 3-, 4-, 5-positions and 3', 4', 5'-positions, respectively, indicated that the sterically bulkier substituent is favored at above positions to increase the logK<sub>ow</sub> of PCBs. From the contribution rates of the descriptor fields, the two models mutually verify and prove that electronic effects primarily influence the logK<sub>ow</sub>.

Although the models exhibited a satisfactory fitting ability, stability, and predictive ability, only the CoMFA model contained two descriptor fields (steric and electrostatic fields), presenting certain limitations in terms of the analysis of the effect of the descriptor field and the modification of the information on the compounds. The CoMSIA model contained five descriptor fields (steric fields, electrostatic fields, hydrophobic fields, and hydrogen bond donor/acceptor fields), which provided a more comprehensive understanding of the effect on the physical and chemical properties of PCBs. For example, an analysis of the hydrophobic field could reveal that hydrophobic groups on the 3-, 4-, 5-, 3', 4', and 5'-positions of the benzene ring would increase the logK<sub>ow</sub>.

Furthermore, by comparing 3D contour maps of the CoMFA and CoMSIA models, we found that massive regions of the CoMFA contour maps were larger, and the distribution of molecular fields was wide, making it difficult to pinpoint the influence area. Therefore, contour maps of the CoMFA model were selected to modify compounds.

## Molecule modification of low biological enrichment newly designed PCB-207 molecules based on 3D-QSAR/HQSAR models

The effect of each field on the substitution characteristics of each site of the target molecular can be obtained by 3D-QSAR model, and the HQSAR model can determine the substitution sites that contribute most to the bioaccumulation of the compounds. Combined with the 3D contour plot of 3D-QSAR CoMSIA model and activity contribution diagram of HQSAR model, the target molecular can be modified to the low biological enrichment newly designed PCBs-207 molecules by determining the substitution sites and substituent groups.

As can be known from target molecular activity contribution diagram of HQSAR, Cl<sub>4</sub>, Cl<sub>5</sub>, Cl<sub>6</sub> molecular Cl-substitutions have an uppermost PC to the bioaccumulation activity. A synthetic analysis of the effect of steric, electrostatic, and hydrophobic fields in the CoMSIA model showed that Cl<sub>5</sub> molecular Cl-Substitution was located in green contours of the steric contour map; Cl<sub>4</sub>, Cl<sub>5</sub> atoms were located in the red contours of the electrostatic contour map; Cl<sub>4</sub>, Cl<sub>5</sub> atoms were located in the white contours of the hydrophobic contour map. Know then, Cl<sub>4</sub> molecular Cl-Substitution was affected by the electrostatic fields and hydrophobic fields, Cl<sub>5</sub> atom was affected by three molecular fields of the steric fields, electrostatic fields and hydrophobic fields. According to the PLS analysis in Table 1, the contribution rate of the steric fields under the CoMSIA model is only 0.90%, so only the influence of the electrostatic fields and the hydrophobic fields on the molecular modification is considered. Therefore, it was conducive to reducing the  $K_{ow}$  value of monosubstituted compounds introducing electron withdrawing or hydrophobic groups at Cl<sub>4</sub>, Cl<sub>5</sub> two positions, respectively, and reducing the  $K_{ow}$  value of the bis-substituted compounds introducing electron withdrawing or hydrophobic groups at Cl<sub>4</sub>, Cl<sub>5</sub> positions at same time.

Based on the above analysis, ten kinds of groups with less electronegativity than Cl atom and hydrophobic were introduced to modify the target molecular (PCB-207) at Cl<sub>4</sub> and Cl<sub>5</sub> Cl-substitutions. A total of 63 monosubstituted and bis-substituted substitution schemes were established by combining substitution sites and substituent groups. According to the Predicted log $K_{ow}$  values of newly designed PCB-207 molecules through CoMFA and CoMSIA models, the  $K_{ow}$  values of newly designed PCB-207 compounds decreased by embedding the groups with less electronegativity than Cl atom (-OH, -CH<sub>2</sub>OH, -NH<sub>2</sub>, -NO), and groups hydrophobic besides less electronegativity (-CH<sub>2</sub>CH<sub>3</sub>, -Br, -CH<sub>3</sub>, -NO<sub>2</sub>, -Phenyl, -OCH<sub>3</sub>), indicating that the introduction of groups is the reason for the descending  $K_{ow}$  values, the other words descending biological enrichment of the modified compounds.

## POPs characteristic evaluation of low biological enrichment newly designed PCB-207 molecules

From the above analysis, it is known that the bioaccumulation of newly designed PCB-207 molecules is reduced. However, in addition to the bioaccumulation of the four POPs characteristics, the toxicity, persistence, and long-range mobility of the low biological enrichment newly designed PCB-207 molecules needs to be evaluated and analyzed. A total of 32 low biological enrichment newly designed PCB-207 molecules with a  $K_{ow}$  value reduced by more than 10% were selected from 63 newly designed PCB-207 molecules mentioned above and evaluated for toxicity, persistence and long-range mobility to further screen out the optimally modified compounds, and evaluate its functional properties that is to say the flame retardancy, insulation evaluation.

Li et al. [29] constructed the 3D-QSAR model to predict the toxicity parameter  $pEC_{50}$  of PCBs, Xu et al. [30] constructed the 3D-QSAR model to predict the persistence parameter  $t_{1/2}$  of PCBs, and Chen et al. [31] constructed the 3D-QSAR model to predict the long-distance mobility parameter  $K_{OA}$  of PCBs, the present paper will use above model to predict the toxicity, long-lasting, and long-distance mobility of newly designed PCB-207 molecules.

Based on the analysis of 32 new molecules, we knew that the log $K_{ow}$  values of 32 newly designed PCB-207 molecules decreased significantly compared with PCB-194 and PCB-201, indicating that the introduction of groups is the reason for the descending  $K_{ow}$  values of the modified compounds and not the decrease in Cl. Thirty-two kinds of low biological enrichment newly designed PCB-207 molecules with a log $K_{ow}$  value reduced by more than 10% are mostly obtained after being modified and substituted at two substitution sites at same time, thus the log $K_{ow}$  reduction in bis-substituted newly designed molecules is greater than that of monosubstituted newly designed compounds. 12-low biological enrichment newly designed PCB-207 molecules with reduced toxicity, persistence, and long-distance mobility were screened from 32 compounds, and these 12 newly designed PCB-207 molecules were calculated using Gaussian09 for their functional properties. (63 substitution schemes of new designed PCB-207 molecules are shown in the supplementary material.)



**Table 4** Structural modification of newly designed PCB-207 molecules, the predicted values of  $\log K_{ow}$ ,  $\log K_{OA}$ ,  $\log t_{1/2}$ , and  $pEC50$  by CoMFA and CoMSIA models and calculated values of energy gap and C–Cl bond dissociation enthalpy by Gaussian

| Compounds                         | Predicted $\log K_{ow}$ |        | Predicted $\log K_{OA}$ |        | Predicted $\log t_{1/2}$ |        | Predicted $pEC50$ |        | Energy gap | Change in rate of energy gap (%) | C–Cl bond dissociation enthalpy (kcal/mol) |
|-----------------------------------|-------------------------|--------|-------------------------|--------|--------------------------|--------|-------------------|--------|------------|----------------------------------|--------------------------------------------|
|                                   | CoMFA                   | CoMSIA | CoMFA                   | CoMSIA | CoMFA                    | CoMSIA | CoMFA             | CoMSIA |            |                                  |                                            |
| PCB-207                           | 10.613                  | 11.538 | 10.613                  | 11.538 |                          | 1.889  | 5.672             | 5.646  | 0.20367    |                                  | 70.706                                     |
| 5-Methyl-PCB-207                  | 6.124                   | 6.781  | 9.799                   | 10.777 | 1.198                    | 1.474  | 4.496             | 4.873  | 0.20641    | 1.35%                            | 24.698                                     |
| 5-Amino-PCB-207                   | 6.241                   | 6.849  | 9.245                   | 10.681 | 1.255                    | 1.386  | 4.091             | 3.987  | 0.19920    | −2.19%                           | 25.405                                     |
| 4-Oxhydyl-5-methyl-PCB-207        | 6.738                   | 6.850  | 10.407                  | 10.649 | 1.404                    | 1.454  | 4.182             | 4.555  | 0.19884    | −2.37%                           | 25.624                                     |
| 4-Hydroxymethyl-5-methyl-PCB-207  | 6.111                   | 6.404  | 9.055                   | 10.015 | 1.109                    | 1.388  | 4.003             | 3.657  | 0.20253    | −0.56%                           | 25.033                                     |
| 4-Amino-5-ethyl-PCB-207           | 6.748                   | 6.488  | 9.995                   | 9.918  | 1.299                    | 1.429  | 3.115             | 2.869  | 0.20327    | −0.20%                           | 25.279                                     |
| 4-Amino-5-phenyl-PCB-207          | 6.483                   | 6.907  | 10.196                  | 10.924 | 1.148                    | 1.543  | 4.438             | 4.670  | 0.20140    | −1.11%                           | 25.371                                     |
| 4-Bromine-5-hydroxymethyl-PCB-207 | 6.017                   | 6.813  | 8.726                   | 10.481 | 1.052                    | 1.365  | 4.539             | 5.198  | 0.20449    | 0.40%                            | 27.039                                     |
| 4-Ethyl-5-hydroxymethyl-PCB-207   | 6.374                   | 6.471  | 10.425                  | 10.361 | 1.283                    | 1.510  | 3.322             | 4.360  | 0.20475    | 0.53%                            | 25.212                                     |
| 4-Methyl-5-hydroxymethyl-PCB-207  | 6.288                   | 6.395  | 9.927                   | 10.086 | 1.278                    | 1.316  | 5.108             | 4.792  | 0.20477    | 0.54%                            | 25.021                                     |
| 4-Phenyl-5-hydroxymethyl-PCB-207  | 6.078                   | 6.796  | 8.601                   | 8.165  | 1.041                    | 1.324  | 4.437             | 4.945  | 0.20076    | −1.43%                           | 24.872                                     |
| 4-Phenyl-5-amino-PCB-207          | 6.146                   | 6.741  | 8.683                   | 8.309  | 1.160                    | 1.404  | 3.924             | 4.049  | 0.20237    | −0.64%                           | 25.887                                     |
| 4-Methyl-5-methyl-PCB-207         | 5.898                   | 6.236  | 9.809                   | 10.002 | 1.118                    | 1.424  | 4.184             | 4.340  | 0.20283    | −0.41%                           | 25.021                                     |

## Functional properties (flame retardancy, insulativity) evaluation of low biological enrichment newly designed PCB-207 molecules

Energy gap (insulativity parameter) and C–Cl bond dissociation enthalpy (flame retardancy parameter) of PCB-207 molecules and low biological enrichment newly designed PCB-207 molecules were calculated using Gaussian09 showed in Table 4. The insulation information of newly designed molecules can be obtained by calculating the energy gap value, in the same way, the flame retardancy information about low biological enrichment newly designed PCB-207 molecules can be obtained by calculating the C–Cl bond dissociation enthalpy.

As shown in Table 4, the dissociation enthalpies of C–Cl bonds are lower than those of the target molecular PCB-207 (70.706 kcal/mol) under the condition that four POPs characteristic parameters of 12 low biological enrichment newly designed PCB-207 molecules are reduced. Studies have shown that PCBs will release HCl during combustion process, capturing and reacting with highly active H and OH radicals produced during the combustion reaction of polymer materials sequentially, eventually leading to the slowdown or termination of combustion [32,33]. The dissociation of C–Cl bond is closely related to the flame retardant efficiency of PCBs, indicating that the low biological enrichment newly designed PCB-207 molecules after being modified are more likely to release Cl-free radicals and HCl for inflaming retarding. The energy gap values increase in four low biological enrichment new designed PCB-207 molecules (5-methyl-PCB-207, 4-bromine-5-hydroxymethyl-PCB-207, 4-ethyl-5-hydroxymethyl-PCB-207, and 4-methyl-5-hydroxymethyl-PCB-207) was 0.40–1.35%, indicating that the insulation increased; and the energy gap values decreased of the rest eight low biological enrichment newly designed PCB-207 molecules was from −0.37 to 0.20%, the amplitude of increase or decrease both are small, thus explaining that the effect on the degree of energy gap of low biological enrichment modified PCB-207 compounds improves the flame retardancy while the insulation remained essentially unchanged.

## Mechanism analysis of biological enrichment of PCBs

### Analysis of the effects of Cl substitutes on bioaccumulation of PCBs

There are ten Cl isomers of PCBs, one to ten chlorinated biphenyls. The values of 209 kinds of PCBs molecules in Table 2 are used for predicting the mean value of  $\log K_{ow}$  of PCBs from one to ten chlorine number. The values of fitting correlation coefficients  $R^2$  for the value of  $\log K_{ow}$  and the number of chlorine atom under CoMFA and CoMSIA model are 0.70911 and 0.81723 ( $n=10$ ,  $P=0.01$ ,  $r > r_0$ ), respectively. The values of  $R^2$  for the mean value of  $\log K_{ow}$  and the number of chlorine atom under each category are 0.9907 and 0.9992 ( $n=209$ ,  $P=0.01$ ,  $r > r_0$ ), respectively. These results show that the values of  $\log K_{ow}$  gradually increased with the increasing number of Cl atoms, and stronger  $K_{ow}$  values of PCBs imply a stronger biological enrichment ability of PCBs. Thus, the biological enrichment increased with the increasing number of Cl atoms.

The names of the five most common PCB mixtures commodity are Aroclor1016 (41.5% Cl), Aroclor1242 (42% Cl), Aroclor1248 (48% Cl), Aroclor1254 (54% Cl), and Aroclor1260 (60% Cl), respectively. Except for Aroclor1016,

**Table 5** The isomer ratios of Cl in the common mixture PCB goods [33]

| The Cl isomer       | The common PCB mixtures |             |             |             |             |
|---------------------|-------------------------|-------------|-------------|-------------|-------------|
|                     | Aroclor1016             | Aroclor1242 | Aroclor1248 | Aroclor1254 | Aroclor1260 |
| Chlorobiphenyl      | 0.7                     | 0.8         | 0.0         | 0.0         | 0.0         |
| Dichlorobiphenyl    | 17.5                    | 15.0        | 0.4         | 0.2         | 0.1         |
| Trichlorobiphenyl   | 54.7                    | 44.9        | 22.0        | 1.3         | 0.2         |
| Tetrachlorobiphenyl | 26.6                    | 32.6        | 56.6        | 16.4        | 0.5         |
| Pentachlorobiphenyl | 0.5                     | 6.4         | 18.6        | 53.0        | 8.6         |
| Hexachlorobiphenyl  | 0.0                     | 0.3         | 2.0         | 26.8        | 43.4        |
| Heptachlorobiphenyl | 0.0                     | 0.0         | 0.6         | 2.7         | 38.5        |
| Octachlorobiphenyl  | 0.0                     | 0.0         | 0.0         | 0.0         | 8.3         |
| Nonachlorobiphenyl  | 0.0                     | 0.0         | 0.0         | 0.0         | 0.7         |
| Decachlorobiphenyl  | 0.0                     | 0.0         | 0.0         | 0.0         | 0.0         |

the first two digits of other commodity name are 12, which represent the number of carbon atoms in PCB molecules. The last two digits represent the isomer ratios of Cl in the commercial mixtures of PCBs, indicating the name of commodity according to the different degree of chloride.

Table 5 [31] presents the ratio of the isomers contained in each PCBs commodity mixtures, which show that the Cl isomers from trichlorodiphenyl to heptachlorobiphenyl make up most of the commercial products of PCBs, and chlorobiphenyl and dichlorobiphenyl also account for a certain percentage of the total products, while the Cl range from octachlorobiphenyl to decachlorobiphenyl is rarely used in commercial mixture of PCBs.

The following PCB congeners were detected in *Lampetra fluviatilis* in Europe by Merivirta et al. [34]: PCB-28, 52, 101, 114, 118, 128, 138, 141, 149, 151, 153, 170, 180. The range of these congeners is from trichlorodiphenyl to heptachlorobiphenyl. The study of PCB accumulation and dietary exposure to fish in Hyderabad, India, by Ahmed et al. [35], found that PCB congeners in all fish species are distributed in the dichlorobiphenyl to decachlorobiphenyl. Russo et al. [36] traced PCBs enriched in water samples found that PCB homologs recovered from water samples contained (PCB-1, 15, 31, 44, 138, 180, 195), in which the range is chlorobiphenyl, dichlorobiphenyl, trichlorodiphenyl, tetrachlorobiphenyl, hexachlorobiphenyl, heptachlorobiphenyl, and octachlorobiphenyl. This is consistent with the finding in Table 5 that the range of almost all PCBs that can be detected in all aquatic organisms cover trichlorodiphenyl to heptachlorobiphenyl. The results showed that the more the certain PCBs homolog used, the more the detection.

### Mechanism analysis of biological enrichment of PCBs based on molecular docking

Take 209 kinds of PCBs bioaccumulation in fish as the target molecule docking with its degrading enzyme, getting the corresponding scoring function associated with its bioaccumulation. The higher the scoring function, the better the PCBs and degrading enzymes bind, and the easier degradable PCB molecules are, the lower the bioaccumulation is. Therefore, the relationship between the number of Cl atoms and the bioaccumulation is verified by this way. BphA is the only enzyme direct contact with PCBs in biodegradation. Thus, BphA was used to dock with 209 PCBs using protein structure of 2GBX [37].

According to the scoring functions of all the Cl isomers from chlorobiphenyl to decachlorobiphenyl binding with BphA enzyme, the average Total Score under each Cl atom classification was 3.087, 2.564, 2.187, 1.560, 1.177, 0.817, 0.633, 0.432, 0.427, and 0.130, respectively, the average Total Score under each Cl atom classification of PCBs binding with BphA enzyme and the number of Cl atoms fit the curve  $y = -0.32417x + 3.08427$ ,  $R^2 = 0.93251$ , thus  $r = 0.9656$ . When the significance level  $P=0.01$ ,  $r_0 = 0.7645$ , there was a significant linear relationship between the total score of PCBs binding to BphA enzyme and the number of Cl atoms in each classification ( $n=10$ ,  $P=0.01$ ,  $r > r_0$ ). The higher the total score, the better the binding of PCB molecules with the BphA enzyme, and the lower the biological enrichment. As the number of Cl atoms increases, the total score shows a decreasing trend, which indicating that highly chlorinated PCBs are not easily degraded and more easily enriched in the fish body, that is, the number of Cl atoms increases, their biological enrichment follows enhanced. In addition, a linear correlation between the total score obtained by molecular docking between 209 PCBs and BphA enzyme and the number of corresponding Cl atoms was obtained, the correlation coefficient  $r^2$  was 0.6757.

It can be seen from Table 6 that when the significance level  $P=0.01$ , the  $r$  of the four linear fitting relationships is greater than the correlation coefficient test critical value  $r_0$ , indicating that the  $\log K_{ow}$  values of PCB molecules and the total scores of docking with BphA enzymes (represent biological enrichment) and the number of Cl atoms have a strong correlation.

**Table 6** Correlation coefficient critical value test of PCBs predicted  $\log K_{ow}$  values and total scores with number of chlorines

|                                                                                | <i>P</i> | <i>n</i> | <i>r</i> <sub>0</sub> | <i>r</i> |         |
|--------------------------------------------------------------------------------|----------|----------|-----------------------|----------|---------|
|                                                                                |          |          |                       | CoMFA    | CoMSIA  |
| The linear fitting of Cl atoms compared with 10 $\log K_{ow}$ average values   | 0.01     | 10       | 0.76459               | 0.99070  | 0.99920 |
| The linear fitting of Cl atoms compared with 209 $\log K_{ow}$ values          | 0.01     | 209      | 0.10898               | 0.84219  | 0.90401 |
| The linear fitting of Cl atoms compared with 10 average values of Total Scores | 0.01     | 10       | 0.76459               | 0.96567  |         |
| The linear fitting of Cl atoms compared with 209 PCBs Total Scores             | 0.01     | 209      | 0.10898               | 0.82205  |         |

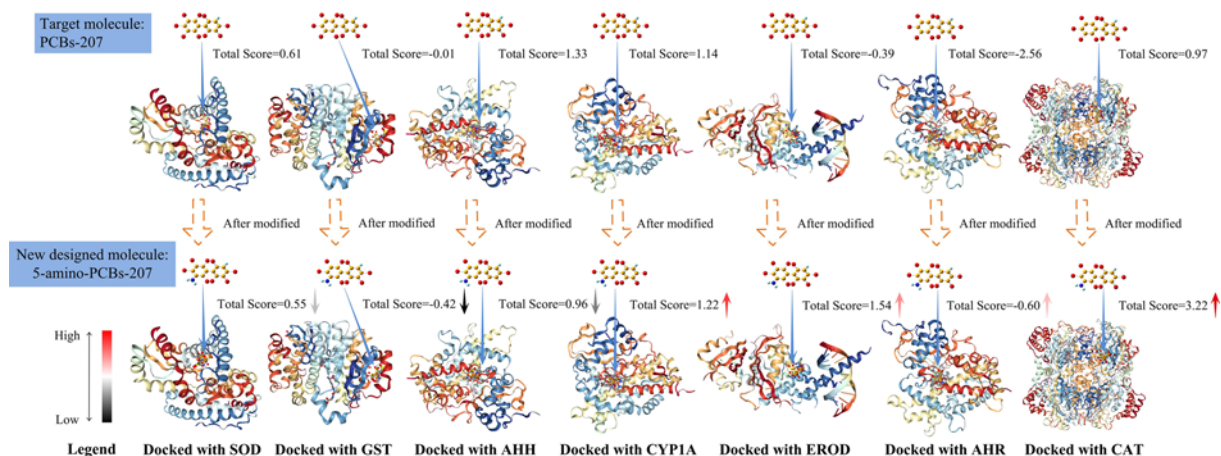

**Figure 5.** Schematic diagram of PCB-207 and newly designed PCB-207 (take 5-amino-PCB-207 as an example) docking with seven enzymes and change of total scores

The  $\log K_{ow}$  values used for modeling comes from experimental determinations and belongs to the property values of PCB molecules, but the effect of bioaccumulation on specific receptor proteins is unknown. In order to further investigate the effect of low biological enrichment newly designed PCBs-207 molecules on the bioaccumulation of liver enzymes in fish, 12 newly designed PCB-207 molecules, in which all the POPs characteristic parameters are reduced while the actual functional properties are not changed were respectively docked with aryl hydrocarbon receptor (AHR) [38], superoxide dismutase (SOD) [39], cytochrome P450-dependent monooxygenases (CYP1A) [40], ethoxyresorufin-o-deethylase (EROD) [41], glutathione *s*-transferase (GST) [42], catalase (CAT) [43], and the aryl hydrocarbon hydroxylase (AHH) [44] to verify whether the 12 newly designed PCB-207 molecules have low bioaccumulation for various enzymes. The structures of seven receptor proteins are all from the Protein Data Bank (<http://www.rcsb.org/pdb>), SOD is an antioxidant enzyme located in erythrocytes of the liver, which the enzymatic activity reduced due to PCBs entering [45]. EROD enzyme was shown to directly contact PCBs and is regulated by CYP1A enzymes. The higher the concentration of pollutants entering the fish, the more the enzyme quantity, and the higher the enzyme activity [46]. When the pollutants enter the body of the tested zebrafish, the GST in liver activity decreases [47].

As shown in Figure 5, taking the modified molecule 5-amino-PCB-207 as an example, compared with the target molecule PCB-207, the total score of 5-amino-PCB-207 molecular docking with SOD, GST, and AHH had declined. According to the color of the legend, the decreasing order of total score values for 5-amino-PCB-207 docking with enzymes is GST > AHH > SOD; the total score of 5-amino-PCB-207 molecular docking with CYP1A, EROD, AHR, and CAT had increased. According to the color of the legend, the increasing order of total score values for 5-amino-PCB-207 docking with enzymes is CAT > CYP1A > EROD > AHR.

The decrease in total score indicated that the binding of 5-amino-PCB-207 with SOD, GST, and AHH had got worse, which could reduce PCBs' enrichment in liver. Although the increase in total score indicated that the degree of biological enrichment for 5-amino-PCB-207 in CYP1A, EROD, AHR, and CAT did not decrease, that is, not all of the 12 low biological enrichment new designed PCB-207 molecules reduce the bioaccumulation at liver enzymes, the present paper only provides a method to study the bioaccumulation effects of new molecules on specific receptors by using molecular docking.

**Table 7 Total scores of PCB-207 and new designed PCB-207 docking with seven enzymes**

| Compounds                         | Total score |       |             |              |       |             |              |
|-----------------------------------|-------------|-------|-------------|--------------|-------|-------------|--------------|
|                                   | SOD         | CYP1A | EROD        | GST          | AHR   | AHH         | CAT          |
| PCB-207                           | 0.61        | -2.56 | 1.14        | -0.01        | -0.39 | 1.33        | 0.97         |
| 5-methyl-PCB-207                  | <b>0.56</b> | 0.22  | 1.65        | <b>-0.2</b>  | 1.03  | 1.42        | <b>-0.45</b> |
| 5-amino-PCB-207                   | <b>0.55</b> | -0.6  | 1.22        | <b>-0.42</b> | 1.54  | <b>0.96</b> | 3.22         |
| 4-oxhydriyl-5-methyl-PCB-207      | <b>0.57</b> | -0.19 | 2.33        | <b>-0.32</b> | 2.28  | 1.92        | 3.22         |
| 4-hydroxymethyl-5-methyl-PCB-207  | 2.43        | 0.48  | 2.15        | 0.85         | 2.35  | 1.55        | 2.84         |
| 4-amino-5-ethyl-PCB-207           | 1.73        | 0.55  | <b>0.80</b> | <b>-0.18</b> | 1.18  | <b>1.29</b> | 1.42         |
| 4-amino-5-phenyl-PCB-207          | 2.30        | -2.28 | 2.93        | 0.90         | 1.07  | <b>1.32</b> | 3.92         |
| 4-bromine-5-hydroxymethyl-PCB-207 | <b>0.53</b> | 1.00  | 1.17        | 0.08         | 0.85  | <b>1.22</b> | 3.04         |
| 4-ethyl-5-hydroxymethyl-PCB-207   | <b>0.52</b> | -0.22 | 2.92        | 0.54         | 2.80  | 1.39        | 4.86         |
| 4-methyl-5-hydroxymethyl-PCB-207  | <b>0.50</b> | -0.89 | 1.34        | 1.00         | 2.94  | <b>1.21</b> | 1.31         |
| 4-phenyl-5-hydroxymethyl-PCB-207  | 1.37        | -1.63 | 1.68        | 1.86         | 4.00  | 2.38        | 4.20         |
| 4-phenyl-5-amino-PCB-207          | 0.87        | -0.57 | <b>0.72</b> | 0.24         | 1.04  | 2.13        | 4.03         |
| 4-methyl-5-methyl-PCB-207         | <b>0.44</b> | 0.93  | 1.42        | 0.54         | 2.21  | 1.56        | 3.18         |

The bold indicates the total scores of new designed PCB-207 docking with enzymes that were lower than the Total scores of that of PCB-207.

Table 7 showed the total scores of 12 low biological enrichment newly designed PCB-207 molecules after docking with seven enzymes. It can be seen from the total scores in Table 7, 5-methyl-PCB-207, 5-amino-PCB-207 and 4-amino-5-ethyl-PCB-207, the binding extent of each newly designed molecular mentioned above to the three enzymes was decreasing compared with that of the target molecular PCB-207. For example, the total scores of 5-methyl-PCB-207 docking with SOD, GST and CAT enzymes were lower than the total scores of the target molecular PCB-207 docking with the above three enzymes; the total scores of 5-amino-PCB-207 docking with SOD, GST, and AHH enzymes were lower than the total scores of the target molecular PCB-207 docking with the above three enzymes; the total scores of 4-amino-5-ethyl-PCB-207 docking with EROD, GST, and AHH enzymes were lower than the total scores of the target molecular PCB-207 docking with the above three enzymes.

## Conclusion

- (1) In the present study, HQSAR model was constructed to determine that the Cl-substitutions Cl<sub>4</sub>, Cl<sub>5</sub>, and Cl<sub>6</sub> have an uppermost PC to the bioaccumulation activity. Based on 3D contour plot of CoMSIA model, indicated that introducing electron withdrawing or hydrophobic groups into Cl<sub>4</sub> and Cl<sub>5</sub> substitution sites of PCB molecules could decrease the bioaccumulation of target molecular. Coupled with HQSAR and CoMSIA model, reduced the *K<sub>ow</sub>* value of monosubstituted compounds by introducing electron withdrawing or hydrophobic groups at Cl<sub>4</sub>, Cl<sub>5</sub> two positions, respectively, and reducing the *K<sub>ow</sub>* value of the bis-substituted compounds by introducing electron withdrawing or hydrophobic groups at Cl<sub>4</sub>, Cl<sub>5</sub> positions at same time.
- (2) Based on HQSAR/CoMSIA model, 12 kinds of novel PCB-207 molecules were designed, which have lower biological enrichment, toxicity, persistence, and long-distance migration ability while the actual functional properties (insulation and flame retardancy) are not changed. Based on the molecular docking, the bioaccumulation mechanism of PCBs shows that the biological enrichment effect of highly chlorinated PCBs is significantly higher than that of PCBs with less Cl substituents. Through the molecular docking, it can also reflect the biological enrichment effect of low biological enrichment new designed PCB-207 molecules on the specific enzymes in the liver of fish and further screen out the environmentally-friendly features of the more obvious low biological enrichment new designed PCB-207 molecules.

## Author contribution

Establishment of models, collection, analysis, and interpretation of the data: J.Y. Drafting the article or revising it critically for important intellectual content: Y.L. and W.G. All authors approved the final version for publication and agree to be accountable for all aspects of the work in ensuring that questions related to the accuracy or integrity of any part of the work are appropriately investigated and resolved. All persons designated as authors qualify for authorship, and all those who qualify for authorship are listed.

## Competing interests

The authors declare that there are no competing interests associated with the manuscript.



## Funding

This work was supported by the Fundamental Research Funds for the Central Universities in 2013 [grant number JB2013146]: the Study on Toxicity Control of PBDEs Based on Quantum Chemistry and QSAR Model; and the Fundamental Research Funds for the Central Universities in 2017 [grant number 2017XS058]: the Study on Enhancement of Vibrational Spectra by Derivation of Phthalic Acid Esters using Pharmacophore Model.

## Abbreviations

AHH, aryl hydrocarbon hydroxylase; AHR, aryl hydrocarbon receptor; CAT, catalase; Ch, chirality; CoMFA, comparative molecular field analysis; CoMSIA, comparative molecular similarity indices analysis; CYP1A, cytochrome P450-dependent monooxygenase; EROD, ethoxyresorufin-o-deethylase; GST, glutathione s-transferase; HOMO, highest occupied molecular orbital; HQSAR, hologram quantitative structure–activity relationship; PCB, polychlorinated biphenyl; PLS, partial least square; POP, persistent organic pollutant; SE<sub>cv</sub>, cross-validated standard error of estimate; SEE, standard error of estimate; SOD, superoxide dismutase.

## References

- Mullins, M.D., Pochini, C.M., Mccrindle, S., Romkes, M., Safe, S.H. and Safe, L.M. (1984) High-resolution PCB analysis: synthesis and chromatographic properties of all 209 PCB congeners. *Environ. Sci. Technol.* **18**, 468–476, <https://doi.org/10.1021/es00124a014>
- Zhang, P., Ge, L.K., Zhou, C.G. and Yao, Z.W. (2011) Evaluating the performances of accelerated-solvent extraction, microwave-assisted extraction, and ultrasonic-assisted extraction for determining PCBs, HCHs and DDTs in sediments. *Chin. J. Ocean Limnol.* **29**, 1103–1112, <https://doi.org/10.1007/s00343-011-0243-z>
- Waller, C.L. (2004) A comparative QSAR study using CoMFA, HQSAR, and FRED/SKEYS paradigms for estrogen receptor binding affinities of structurally diverse compounds. *J. Chem. Inf. Comput. Sci.* **44**, 758–765, <https://doi.org/10.1021/ci0342526>
- Zhu, X.W., Liu, S.S., Ge, H.L. and Liu, Y. (2009) Comparison between the short-term and the long-term toxicity of six triazine herbicides on photobacteria Q67. *Water Res.* **43**, 1731–1739, <https://doi.org/10.1016/j.watres.2009.01.004>
- Liu, S.S., Song, X.Q., Liu, H.L., Zhang, Y.H. and Zhang, J. (2009) Combined photobacterium toxicity of herbicide mixtures containing one insecticide. *Chemosphere* **75**, 381–388, <https://doi.org/10.1016/j.chemosphere.2008.12.026>
- Su, L.M., Zhao, Y.H., Yuan, X., Mu, C.F., Wang, N. and Yan, J.C. (2010) Evaluation of combined toxicity of phenols and lead to photobacterium phosphoreum and quantitative structure-activity relationships. *Bull. Environ. Contam. Toxicol.* **84**, 311–314, <https://doi.org/10.1007/s00128-009-9665-0>
- Coriolini, S., Romeo, T., Ademollo, N., Greco, S. and Focardi, S. (2002) Pops in key species of marine antarctic ecosystem. *Microchem. J.* **73**, 187–193, [https://doi.org/10.1016/S0026-265X\(02\)00063-2](https://doi.org/10.1016/S0026-265X(02)00063-2)
- Engel, L.S., Laden, F., Andersen, A., Strickland, P.T., Blair, A., Needham, L.L. et al. (2007) Polychlorinated biphenyl levels in peripheral blood and non-Hodgkin's lymphoma: a report from three cohorts. *Cancer Res.* **67**, 5545–5552, <https://doi.org/10.1158/0008-5472.CAN-06-3906>
- Achman, D.R., Brownawell, B.J. and Zhang, L. (1996) Exchange of polychlorinated biphenyls between sediment and water in the Hudson River estuary. *Estuaries* **19**, 950–965, <https://doi.org/10.2307/1352310>
- Chevreuil, M., Blanchard, M., Teil, M.J. and Chesterikoff, A. (1998) Polychlorobiphenyl behaviour in the water/sediment system of the Seine river, France. *Water Res.* **32**, 1204–1212, [https://doi.org/10.1016/S0043-1354\(97\)00328-X](https://doi.org/10.1016/S0043-1354(97)00328-X)
- Wu, T.X., Cruz, V., Mezyk, S., Cooper, W.J. and O'Shea, K.E. (2002) Gamma radiolysis of methyl t-butyl ether: a study of hydroxyl radical mediated reaction pathways. *Radiat. Phys. Chem.* **65**, 335–341, [https://doi.org/10.1016/S0969-806X\(02\)00350-X](https://doi.org/10.1016/S0969-806X(02)00350-X)
- Orbea, A., Ortiz-Zarragoitia, M., Solé, M., Porte, C. and Cajaraville, M.P. (2002) Antioxidant enzymes and peroxisome proliferation in relation to contaminant body burdens of PAHs and PCBs in bivalve molluscs, crabs and fish from the Urdaibai and Plentzia estuaries (Bay of Biscay). *Aquat. Toxicol.* **58**, 75–98, [https://doi.org/10.1016/S0166-445X\(01\)00226-0](https://doi.org/10.1016/S0166-445X(01)00226-0)
- Pan, Q., Inouye, K., Ito, T., Nagai, H., Takeuchi, Y., Miyabara, Y. et al. (2004) Evaluation of relative potencies of PCB126 and PCB169 for the immunotoxicities in ovalbumin (OVA)-immunized mice. *Toxicology* **204**, 51–60, <https://doi.org/10.1016/j.tox.2004.06.024>
- Pompa, G., Caloni, F. and Fracchiolla, M.L. (2003) Dioxin and PCB contamination of fish and shellfish: assessment of human exposure. Review of the international situation. *Vet. Res. Commun.* **27**, 159–167, <https://doi.org/10.1023/B:VERC.0000014134.23782.10>
- Sharma, J.K., Gautam, R.K., Nanekar, S.V., Weber, R., Singh, B.K., Singh, S.K. et al. (2017) Advances and perspective in bioremediation of polychlorinated biphenyl-contaminated soils. *Environ. Sci. Pollut. Res.* **25**, 16355–16375
- Hawker, D.W. and Connell, D.W. (1988) Octanol-water partition coefficients of polychlorinated biphenyl congeners. *Environ. Sci. Technol.* **22**, 382–387, <https://doi.org/10.1021/es00169a004>
- Wang, C., Lu, G.H., Tang, Z.Y. and Guo, X.L. (2008) Quantitative structure-activity relationships for joint toxicity of substituted phenols and anilines to *Scenedesmus obliquus*. *J. Environ. Sci.* **20**, 115–119, [https://doi.org/10.1016/S1001-0742\(08\)60018-2](https://doi.org/10.1016/S1001-0742(08)60018-2)
- Jackson, S.H., Cowan-Ellsberry, C.E. and Thomas, G. (2009) Use of quantitative structural analysis to predict fish bioconcentration factors for pesticides. *J. Agric. Food Chem.* **57**, 958–967, <https://doi.org/10.1021/jf803064z>
- Zhao, B.Z., Han, T.X., Hao, X.R., Li, Y.Y., Niu, X.D., Fu, Q. et al. (2004) Theoretical calculation of the solubility for polycyclic aromatic hydrocarbons. *J. Mol. Sci.* **20**, 1–4



- 20 Li, X.L., Ye, L., Wang, X.X., Wang, X.Z., Liu, H.L., Qian, X.P. et al. (2012) Molecular docking, molecular dynamics simulation, and structure-based 3D-QSAR studies on estrogenic activity of hydroxylated polychlorinated biphenyls. *Sci. Total Environ.* **441**, 230–238, <https://doi.org/10.1016/j.scitotenv.2012.08.072>
- 21 Li, X.L., Ye, L., Wang, X.X., Wang, X.Z., Liu, H.L., Zhu, Y.L. et al. (2012) Combined 3D-QSAR, molecular docking and molecular dynamics study on thyroid hormone activity of hydroxylated polybrominated diphenyl ethers to thyroid receptors  $\beta$ . *Toxicol. Appl. Pharm.* **265**, 300–307, <https://doi.org/10.1016/j.taap.2012.08.030>
- 22 Yu, S.L., Yuan, J.T., Shi, J.H., Ruan, X.J., Zhang, T., Wang, Y.L. et al. (2015) HQSAR and topomer CoMFA for predicting melanocortin-4 receptor binding affinities of trans-4-(4-chlorophenyl) pyrrolidine-3-carboxamides. *Chemometr. Intel. Lab.* **146**, 34–41, <https://doi.org/10.1016/j.chemolab.2015.04.017>
- 23 Ewing, T.J.A. and Kuntz, I.D. (2015) Critical evaluation of search algorithms for automated molecular docking and database screening. *J. Comput. Chem.* **18**, 1175–1189, [https://doi.org/10.1002/\(SICI\)1096-987X\(19970715\)18:9%3c1175::AID-JCC6%3e3.0.CO;2-0](https://doi.org/10.1002/(SICI)1096-987X(19970715)18:9%3c1175::AID-JCC6%3e3.0.CO;2-0)
- 24 Chen, J.W., Xue, X.Y., Schramm, K.W., Quan, X., Yang, F.L. and Kettrup, A. (2002) Quantitative structure-property relationships for octanol-air partition coefficients of polychlorinated biphenyls. *Chemosphere* **48**, 535–544, [https://doi.org/10.1016/S0045-6535\(02\)00103-0](https://doi.org/10.1016/S0045-6535(02)00103-0)
- 25 Jiang, L. and Li, Y. (2016) Modification of PBDEs (BDE-15, BDE-47, BDE-85 and BDE-126) biological toxicity, bio-concentration, persistence and atmospheric long-range transport potential based on the pharmacophore modeling assistant with the full factor experimental design. *J. Hazard. Mater.* **307**, 202–212, <https://doi.org/10.1016/j.jhazmat.2015.12.031>
- 26 Faust, R., Garratt, P.J., Jones, R., Yeh, L.K., Tsoinias, A., Panoussopoulou, M. et al. (2000) Mapping the melatonin receptor. 6. Melatonin agonists and antagonists derived from 6H-Isoindolo [2,1-a] indoles, 5,6-Dihydroindolo[2,1-a] isoquinolines, and 6,7-Dihydro-5H-benzo [c] azepino [2,1-a] indoles. *J. Med. Chem.* **43**, 1050–1061, <https://doi.org/10.1021/jm980684a>
- 27 Salahinejad, M. and Ghasemi, J.B. (2013) 3D-QSAR studies on the toxicity of substituted benzenes to *Tetrahymena pyriformis*: CoMFA, CoMSIA and VolSurf approaches. *Ecotox. Environ. Saf.* **105**, 128–134, <https://doi.org/10.1016/j.ecoenv.2013.11.019>
- 28 Worth, A.P., Van Leeuwen, C.J. and Hartung, T. (2004) The prospects of using (Q)SARs in a changing political environment—high expectations and a key role for the European Commission's joint research centre. *SAR QSAR Environ. Res.* **15**, 331–343, <https://doi.org/10.1080/10629360412331297371>
- 29 Li, F., Li, X.H., Liu, X.L., Zhang, L.B., You, L.P., Zhao, J.M. et al. (2011) Docking and 3D-QSAR studies on the Ah receptor binding affinities of polychlorinated biphenyls (PCBs), dibenzo-p-dioxins (PCDDs) and dibenzofurans (PCDFs). *Environ. Toxicol. Phar.* **32**, 478–485, <https://doi.org/10.1016/j.etap.2011.09.001>
- 30 Xu, Z., Chen, Y., Qiu, Y.L., Gu, W.W. and Li, Y. (2016) Prediction of stability for polychlorinated biphenyls in transformer insulation oil through three-dimensional quantitative structure-activity relationship pharmacophore model and full factor experimental design. *Chem. Res. Chin. Univ.* **32**, 348–356, <https://doi.org/10.1007/s40242-016-5461-7>
- 31 Chen, Y., Cai, X.Y., Jiang, L. and Li, Y. (2016) Prediction of octanol-air partition coefficients for polychlorinated biphenyls (PCBs) using 3D-QSAR models. *Ecotox. Environ. Safe* **124**, 202–212, <https://doi.org/10.1016/j.ecoenv.2015.10.024>
- 32 Chen, E.C.M., Albyn, K., Dussack, L. and Wentworth, W.E. (1989) Determination of bond dissociation energies from dissociative thermal electron attachment. *J. Chem. Phys.* **93**, 6827–6832, <https://doi.org/10.1021/j100355a049>
- 33 Alaei, M., Arias, P., Sjödin, A. and Bergman, A. (2003) An overview of commercially used brominated flame retardants, their applications, their use patterns in different countries/regions and possible modes of release. *Environ. Int.* **29**, 683–689, [https://doi.org/10.1016/S0160-4120\(03\)00121-1](https://doi.org/10.1016/S0160-4120(03)00121-1)
- 34 Merivirta, L., Kivisaari, M., Berg, S., Peltonen, K., Björkroth, J. and Korkeala, H. (2006) Accumulation of PCBs and organochlorine pesticides in river-caught European river lamprey (*Lampetra fluviatilis*) in Finland. *Bull. Environ. Contam. Toxicol.* **76**, 497–504, <https://doi.org/10.1007/s00128-006-0948-4>
- 35 Ahmed, M.N., Sinha, S.N., Vemula, S.R., Sivaperumal, P., Vasudev, K., Ashu, S. et al. (2016) Accumulation of polychlorinated biphenyls in fish and assessment of dietary exposure: a study in Hyderabad City, India. *Environ. Monit. Assess.* **188**, 94, <https://doi.org/10.1007/s10661-015-5068-3>
- 36 Russo, M.V., Goretti, G. and Navigato, T. (1999) Sequential solid-phase extraction with cyanopropyl bonded-phase cartridges for trace enrichment of PCBs and chlorinated pesticides from water samples. *Chromatographia* **50**, 446–452, <https://doi.org/10.1007/BF02490740>
- 37 Gibson, D.T., Parales, R.E., Yu, C.L., Brown, E.N., Ferraro, D.J. and Ramaswamy, S. (2007) Structural investigations of the ferredoxin and terminal oxygenase components of the biphenyl 2,3-dioxygenase from *Sphingobium yanoikuyae* B1. *BMC Struct. Biol.* **7**, 1, <https://doi.org/10.1186/1472-6807-7-1>
- 38 Schulte, K.W., Green, E., Wilz, A., Platten, M. and Daumke, O. (2017) Structural basis for aryl hydrocarbon receptor-mediated gene activation. *Structure* **25**, 1025–1033, <https://doi.org/10.1016/j.str.2017.05.008>
- 39 Quint, P., Reutzel, R., Mikulski, R., McKenna, R. and Silverman, D.N. (2006) Crystal structure of nitrated human manganese superoxide dismutase: mechanism of inactivation. *Free Radic. Biol. Med.* **40**, 453–458, <https://doi.org/10.1016/j.freeradbiomed.2005.08.045>
- 40 Sansen, S., Yano, J.K., Reynald, R.L., Schoch, G.A., Griffin, K.J., Stout, C.D. et al. (2007) Adaptations for the oxidation of polycyclic aromatic hydrocarbons exhibited by the structure of human P450 1A2. *J. Biol. Chem.* **282**, 14348–14355, <https://doi.org/10.1074/jbc.M611692200>
- 41 Savino, C., Montemiglio, L.C., Sciarra, G., Miele, A.E., Kendrew, S.G., Jemth, P. et al. (2009) Investigating the structural plasticity of a cytochrome P450: three-dimensional structures of P450 eryk and binding to its physiological substrate. *J. Biol. Chem.* **284**, 29170–29179, <https://doi.org/10.1074/jbc.M109.003590>
- 42 Prade, L., Huber, R., Manoharan, T.H., Fahl, W.E. and Reuter, W. (1997) Structures of class pi glutathione S-transferase from human placenta in complex with substrate, transition-state analogue and inhibitor. *Structure* **5**, 1287–1295, [https://doi.org/10.1016/S0969-2126\(97\)00281-5](https://doi.org/10.1016/S0969-2126(97)00281-5)
- 43 Mate, M.J., Zamocky, M., Nykyri, L.M., Herzog, C., Alzari, P.M., Betzel, C. et al. (1999) Structure of catalase-A from *Saccharomyces cerevisiae*. *J. Mol. Biol.* **286**, 135–149, <https://doi.org/10.1006/jmbi.1998.2453>

- 44 Walsh, A.A., Szklarz, G.D. and Scott, E.E. (2013) Human cytochrome P450 1A1 structure and utility in understanding drug and xenobiotic metabolism. *J. Biol. Chem.* **288**, 12932–12943, <https://doi.org/10.1074/jbc.M113.452953>
- 45 Ighodaro, O.M. and Akinloye, O.A. (2017) First line defence antioxidants-superoxide dismutase (SOD), catalase (CAT) and glutathione peroxidase (GPX): their fundamental role in the entire antioxidant defence grid. *Alexandria J. Med.*, <https://doi.org/10.1016/j.ajme.2017.09.001>
- 46 Kais, B., Ottermanns, R., Scheller, F. and Braunbeck, T. (2018) Modification and quantification of *in vivo* EROD live-imaging with zebrafish (*Danio rerio*) embryos to detect both induction and inhibition of CYP1A. *Sci. Total Environ.* **615**, 330–347, <https://doi.org/10.1016/j.scitotenv.2017.09.257>
- 47 Pugazhendhi, A., Dhanarani, S., Shankar, C., Prakash, P., Ranganathan, K., Saratale, R.G. et al. (2017) Electrophoretic pattern of glutathione S-transferase (GST) in antibiotic resistance Gram-positive bacteria from poultry litter. *Microb. Pathog.* **110**, 285–290, <https://doi.org/10.1016/j.micpath.2017.07.003>
